# Supplementary material for: Nitrogen form-dependent microbial siderophore diversity shapes wheat-pathogen dynamics
Source: Research Square preprint supplement (doi:10.21203/rs.3.rs-8668036/v1), 2026-02-02
Supplement: Supplementary file 1 [file 1bd926706f7d3759bf82bb7b.xlsx]

## Sheet: Table 1
Supplementary Table 1. Keystone bacterial ASVs identified through microbial co-occurrence network analysis, comparing rhizosphere communities between healthy and diseased soils (pot Experiment 1).
Status	Kingdom	Phylum	Class	Order	Family	Genus	ASV ID	Degree	N-responsive（YES/NO）
Diseased	Bacteria	Proteobacteria	Subgroup_6	Rhizobiales	Rhizobiaceae	Rhizobium	ASV509	17	YES
Diseased	Bacteria	Proteobacteria	Deltaproteobacteria	Myxococcales	BIrii41	Unassigned	ASV666	17	YES
Diseased	Bacteria	Actinobacteria	Actinobacteria	Propionibacteriales	Nocardioidaceae	Unassigned	ASV721	17	YES
Diseased	Bacteria	Proteobacteria	Alphaproteobacteria	Sphingomonadales	Sphingomonadaceae	Sphingopyxis	ASV1072	17	YES
Diseased	Bacteria	Chloroflexi	Anaerolineae	SBR1031	A4b	Unassigned	ASV1222	17	YES
Diseased	Bacteria	Actinobacteria	Actinobacteria	Propionibacteriales	Nocardioidaceae	Nocardioides	ASV98	17	YES
Diseased	Bacteria	Proteobacteria	Gammaproteobacteria	Xanthomonadales	Unassigned	Unassigned	ASV1301	15	NO
Diseased	Bacteria	Proteobacteria	Gammaproteobacteria	Betaproteobacteriales	Burkholderiaceae	Unassigned	ASV710	13	YES
Diseased	Bacteria	Bacteroidetes	Bacteroidia	Cytophagales	Cytophagaceae	Sporocytophaga	ASV890	13	NO
Diseased	Bacteria	Actinobacteria	Acidimicrobiia	Unassigned	Unassigned	Unassigned	ASV1473	13	YES
Diseased	Bacteria	Bacteroidetes	Rhodothermia	Rhodothermales	Rhodothermaceae	Unassigned	ASV2071	13	NO
Healthy	Bacteria	Chloroflexi	Anaerolineae	SBR1031	A4b	Unassigned	ASV801	20	NO
Healthy	Bacteria	Acidobacteria	Thermoanaerobaculia	Thermoanaerobaculales	Thermoanaerobaculaceae	Subgroup_10	ASV841	20	NO
Healthy	Bacteria	Acidobacteria	Subgroup_6	Unassigned	Unassigned	Unassigned	ASV865	20	NO
Healthy	Bacteria	Gemmatimonadetes	Longimicrobia	Longimicrobiales	Longimicrobiaceae	Unassigned	ASV1724	20	NO
Healthy	Bacteria	Chlamydiae	Chlamydiae	Chlamydiales	Criblamydiaceae	Estrella	ASV5887	20	NO
Healthy	Bacteria	Verrucomicrobia	Verrucomicrobiae	Opitutales	Opitutaceae	Cephaloticoccus	ASV678	20	NO
Healthy	Bacteria	Bacteroidetes	Bacteroidia	Chitinophagales	Saprospiraceae	Unassigned	ASV897	16	YES
Healthy	Bacteria	Proteobacteria	Deltaproteobacteria	NB1-j	Unassigned	Unassigned	ASV998	16	NO
Note
Keystone ASVs are identified based on bacterial–fungal co-occurrence networks using rhizosphere samples collected from healthy and diseased plants in pot Experiment 1. ASV ID denotes the amplicon sequence variant identifier. Degree indicates node connectivity (the number of co-occurrence links) in the network. N-responsive indicates that the ASV is classified as responsive to nitrogen form (ammon…

## Sheet: Table 2
Supplementary Table 2. Best-subsets regression model of 11 soil physicochemical variables in healthy versus diseased field soils.
Predictor set	RSS	Adjusted R2	Mallows’ Cp	BIC	AICc	LOOCV-MSE
Available Fe	1.749	0.744	-1.952	18.303	17.985	0.129
Available Fe, Available Zn	1.017	0.839	-4.157	12.401	12.947	0.081
C:N ratio, Available Fe, Available Zn	0.907	0.844	-2.785	13.353	15.489	0.101
C:N ratio, Available Fe, Available Zn, NO3--N	0.874	0.837	-0.98	15.517	20.215	0.125
C:N ratio, pH, Available Fe, Available Zn, NO3--N	0.835	0.829	0.796	17.558	26.15	0.128
Total C, Total N, C:N ratio, Available Fe, Available Zn, NO3--N	0.796	0.818	2.573	19.568	33.959	0.291
Total C, Total N, C:N ratio, pH, Available Fe, Available Zn, NO3--N	0.749	0.808	4.306	21.379	44.426	0.327
Total C, Total N, C:N ratio, pH, Available Fe, Available Zn, NH4+-N, NO3--N	0.715	0.79	6.106	23.392	59.666	0.375
Soil water content, Total C, Total N, C:N ratio, pH, Available Fe, Available Zn, NH4+-N, NO3--N	0.708	0.758	8.069	26.018	83.519	0.603
Soil water content, Total C, Total N, C:N ratio, pH, Olsen P, Available Fe, Available Zn, NH4+-N, NO3--N	0.699	0.713	10.017	28.586	123.314	1.237
Soil water content, Total C, Total N, C:N ratio, pH, Olsen P, Available K, Available Fe, Available Zn, NH4+-N, NO3--N	0.696	0.643	12	31.291	203.247	1.446
Note
RSS, residual sum of squares. Adjusted R², adjusted coefficient of determination. Mallows’ Cp, Mallows’ Cp statistic. BIC, Bayesian information criterion. AICc, small-sample corrected Akaike information criterion. LOOCV-MSE, mean squared error from leave-one-out cross-validation. Predictor variables include: available Fe and Zn, total C and total N, C:N ratio, soil water content, Olsen P, availab…

## Sheet: Table 3
Supplementary Table 3. Key predictors in the minimal-subset models distinguishing healthy versus diseased field soils.
Predictor	Relative importance (LMG, %)	95% CI (lower)	95% CI (upper)
Available Fe	93.5	71.3	97.9
Available Zn	6.5	2.1	28.7
Note
LMG (lmg) denotes the Lindeman–Merenda–Gold metric, which decomposes the model R² into additive shares (all ≥ 0) attributable to each predictor, reported as percentages summing to 100%. Confidence intervals (CI) are 95% percentile bootstrap intervals based on 2,000 resamples.

## Sheet: Table 4
Supplementary Table 4. Selected best-subsets model predicting Fusarium pseudograminearum abundance in the field experiment based on soil physicochemical properties. Table includes coefficients (β), standardized coefficients and variance inflation factors (VIF).
Term	Coefficient (β)	s.e.	t	P value	Standardized β	VIF
Intercept	1.483	0.389	3.81	0.002	—	—
Available Fe	0.441	0.05	8.905	<0.001	0.947	1.056
Available Zn	0.563	0.184	3.059	0.009	0.325	1.056
Note
This Table reports the refitted two-predictor linear model (Fpg abundance ~ available Fe + available Zn). Coefficients (β) are shown with standard error (s.e.), t statistics and two-sided P values. Standardized β values are obtained after z-scoring predictors before refitting. Variance inflation factors (VIF) quantify the collinearity among predictors.

## Sheet: Table 5
Supplementary Table 5. Siderophore production of 115 bacterial isolates derived from rhizosphere soil of wheat grown under contrasting nitrogen (ammonium versus nitrate) and iron (iron rich versus limited) conditions.
Isolate	Halo diameter in iron limited medium (mm)	Halo diameter in iron riched medium (mm)	Nitrogen supply form	Genus
B1	5.5	0	Nitrate	Bacillus
B2	6.5	0	Nitrate	Pseudomonas
B3	11.5	11	Nitrate	Pseudomonas
B4	10.5	10	Nitrate	Pseudomonas
B5	7.5	0	Nitrate	Pseudomonas
B6	9	0	Nitrate	Agrobacterium
B7	9	0	Nitrate	Agrobacterium
B8	13	8.5	Nitrate	Pseudomonas
B9	9	5.5	Nitrate	Pseudomonas
B10	15.5	14	Nitrate	Pseudomonas
B11	14.5	13	Nitrate	Pseudomonas
B12	7	1.5	Nitrate	Pseudomonas
B13	7.5	10.5	Nitrate	Pseudomonas
B14	8	11.5	Nitrate	Pseudomonas
B15	10	4.5	Nitrate	Pseudomonas
B16	16	8.5	Nitrate	Paenarthrobacter
B17	17	9.5	Nitrate	Paenarthrobacter
B18	16	7	Nitrate	Stenotrophomonas
B19	15	6.5	Nitrate	Stenotrophomonas
B20	16	4	Nitrate	Pseudomonas
B21	15	4.5	Nitrate	Pseudomonas
B22	40	9.5	Nitrate	Lysobacter
B23	10.5	7.5	Nitrate	Pseudomonas
B24	10	8.5	Nitrate	Pseudomonas
B25	9	3	Nitrate	Pseudomonas
B26	9	4	Nitrate	Pseudomonas
B27	2.5	0	Nitrate	Paenibacillus
B28	0	0	Nitrate	Terribacillus
B29	0	0	Nitrate	Terribacillus
B30	0	0	Nitrate	Paenibacillus
B31	0	0	Nitrate	Paenibacillus
B32	2	1	Nitrate	Paenibacillus
B33	2.5	0.5	Nitrate	Paenibacillus
B34	0	0	Ammonium	Chryseobacterium
B35	0	0	Ammonium	Chryseobacterium
B36	0	0	Ammonium	Cedecea
B37	0	0	Ammonium	Enterobacter
B38	0	0	Ammonium	Bacillus
B39	0	0	Ammonium	Bacillus
B40	0	0	Ammonium	Bacillus
B41	0	0	Ammonium	Bacillus
B42	9	7	Ammonium	Pseudomonas
B43	40	0	Ammonium	Rhodococcus
B44	5.75	0	Ammonium	Rhodococcus
B45	11	14	Ammonium	Pseudomonas
B46	11.5	13	Ammonium	Pseudomonas
B47	8.5	0	Ammonium	Pseudomonas
B48	8	0	Ammonium	Pseudomonas
B49	1.5	0	Ammonium	Cedecea
B50	1	0	Ammonium	Cedecea
B51	10.5	0	Ammonium	Pseudomonas
B52	11	1.5	Ammonium	Pseudomonas
B53	9.5	5	Ammonium	Pseudomonas
B54	10	5.5	Ammonium	Pseudomonas
B55	23.5	6	Ammonium	Pseudomonas
B56	6	0	Ammonium	Enterobacter
B57	5	0	Ammonium	Enterobacter
B58	10.5	0	Ammonium	Pseudomonas
B59	4	0	Ammonium	Enterobacter
B60	5	0	Ammonium	Enterobacter
B61	0	0	Ammonium	Pseudomonas
B62	9.5	4	Ammonium	Pseudomonas
B63	10	6.5	Ammonium	Pseudomonas
B64	11	7	Ammonium	Pseudomonas
B65	9	0	Ammonium	Brevibacterium
B66	8.5	0	Ammonium	Peribacillus
B67	6.5	7	Ammonium	Pseudomonas
B68	10	0	Ammonium	Microbacterium
B69	8.5	0	Ammonium	Microbacterium
B70	9.5	0	Ammonium	Pseudomonas
B71	10	0	Ammonium	Enterobacter
B72	11	5	Ammonium	Pseudomonas
B73	10.5	5.5	Ammonium	Pseudomonas
B74	8.5	1.5	Ammonium	Ensifer
B75	8	0	Ammonium	Ensifer
B76	0	0	Ammonium	Bacillus
B77	1	0	Ammonium	Bacillus
B78	1.5	0	Ammonium	Bacillus
B79	0	0	Ammonium	Pseudomonas
B80	0	0	Ammonium	Pseudomonas
B81	0	0	Ammonium	Paenibacillus
B82	0	0	Ammonium	Paenibacillus
B83	1	0	Ammonium	Pseudomonas
B84	2.5	0	Ammonium	Pseudomonas
B85	0	0	Ammonium	Pseudomonas
B86	0	0	Ammonium	Pseudomonas
B87	42	39	Ammonium	Paenibacillus
B88	38	35	Ammonium	Lactococcus
B89	3	0	Ammonium	Pseudomonas
B90	0	0	Ammonium	Priestia
B91	0	0	Ammonium	Bacillus
B92	0	0	Ammonium	Pseudomonas
B93	3	0	Ammonium	Microbacterium
B94	4	0	Ammonium	Microbacterium
B95	0	0	Ammonium	Bacillus
B96	0	0	Ammonium	Bacillus
B97	0.95	0	Ammonium	Paenibacillus
B98	1.5	0	Ammonium	Paenibacillus
B99	0.75	0	Ammonium	Chryseobacterium
B100	0.9	0	Ammonium	Chryseobacterium
B101	5.5	0	Ammonium	Bacillus
B102	5	0	Ammonium	Bacillus
B103	35	0	Ammonium	Nocardioides
B104	6.15	0	Ammonium	Rhodococcus
B105	0	0	Ammonium	Bacillus
B106	0	0	Ammonium	Bacillus
B107	2.15	0	Ammonium	Bacillus
B108	1.85	0	Ammonium	Bacillus
B109	0	0	Ammonium	Bacillus
B110	0	0	Ammonium	Bacillus
B111	0	0	Ammonium	Bacillus
B112	0	0	Ammonium	Bacillus
B113	0	0	Ammonium	Rhodococcus
B114	45	0	Ammonium	Rhodococcus
B115	10.5	0	Ammonium	Rhizobium
Note
A total of 115 non-redundant bacterial isolates were obtained from wheat rhizosphere soils in pot Experiment 1 under ammonium or nitrate supply. Siderophore production is assessed using a CAS overlay agar assay. Isolates are first grown on iron-limited or iron-replete agar, then overlaid with CAS indicator agar. Siderophore activity is quantified as the diameter (mm) of the orange halo surroundin…

## Sheet: Table 6
Supplementary Table 6. Effects of different bacterial strains on spore growth of Fusarium pseudograminearum (Fpg), and the quantification of the inhibition rate and siderophore production of different strains in co-culture assays.
Strain	Fpg spores (×106 ml−1)	Effect on Fpg spore production (%)	Siderophore production (AU)
Strain 1	3.05	-31.15	0.774
Strain 2	5.4	54.63	0.852
Strain 3	2.75	-25.45	0.536
Strain 4	5.8	0.86	0.678
Strain 5	5.45	6.42	0.536
Strain 6	5.2	22.12	0.919
Strain 7	6.35	-49.61	0.652
Strain 8	7	6.43	0.531
Strain 9	6.65	-14.29	0.705
Strain 10	7.2	-16.67	0.897
Strain 11	4.45	-58.43	0.553
Strain 12	9.05	-13.81	0.54
Strain 13	7.6	-15.13	0.603
Strain 14	9.7	-44.33	0.541
Strain 15	5.75	20.87	0.557
Strain 16	7.8	-5.13	0.732
Strain 17	0.7	100	0.648
Strain 18	7.35	-18.37	0.61
Strain 19	6.25	-0.8	0.594
Strain 20	7.95	-95.6	0.903
Strain 21	6.85	-1.46	0.512
Strain 22	7.7	-18.18	0.818
Strain 23	4.9	5.1	0.605
Strain 24	5.4	87.04	0.56
Strain 25	5.15	28.16	0.751
Strain 26	6.5	21.54	0.572
Strain 27	3.95	75.95	0.578
Strain 28	4.55	-19.78	0.581
Strain 29	6.75	22.96	0.62
Strain 30	7.8	-3.85	0.59
Strain 31	8.65	-11.56	0.647
Strain 32	3.65	79.45	0.839
Strain 33	5.1	63.73	0.656
Strain 34	4.55	-18.68	0.858
Strain 35	6.1	13.11	0.9
Strain 36	0.8	-12.5	0.899
Strain 37	7.1	17.61	0.897
Strain 38	5.25	81.9	0.743
Strain 39	5.33	-69.98	0.853
Strain 40	5.65	46.9	0.568
Strain 41	6.4	13.28	0.604
Strain 42	0	100	0.909
Strain 43	0	100	0.594
Strain 44	6.5	27.69	0.696
Strain 45	5.8	14.66	0.32
Strain 46	4.65	75.27	0.412
Strain 47	6.8	-79.41	0.866
Strain 48	0.05	100	0.373
Strain 49	6.5	11.54	0.876
Strain 50	0	100	0.522
Strain 51	6.1	8.2	0.824
Strain 52	4.3	51.16	0.841
Strain 53	0.7	-14.29	0.412
Strain 54	7.25	-13.79	0.909
Strain 55	0	100	0.379
Strain 56	4.3	86.05	0.583
Strain 57	8.15	-51.53	0.658
Strain 58	4.65	32.26	0.856
Strain 59	0	100	0.911
Strain 60	3.75	77.33	0.896
Strain 61	4.75	-69.47	0.82
Note
Values are means of three independent replicates. Fpg spore number is reported as spores per mL under iron-limited conditions in co-culture assay. Effect (%) is calculated as percentage changes relative to the control, (C − T)/C × 100, where C is the spore number in the control; positive values indicate inhibition, and negative values indicate enhancement. Siderophore production is reported as no…

## Sheet: Table 7
Supplementary Table 7. KEGG orthologues (KOs) assigned to pathway ko01053 (biosynthesis of siderophore group nonribosomal peptides) grouped by nitrogen supply form and disease-status.
KEGG orthologues (KOs)	KO name	Nitrate healthy 1	Nitrate healthy 2	Nitrate healthy 3	Nitrate healthy 4	Nitrate diseased 1	Nitrate diseased 2	Nitrate diseased 3	Nitrate diseased 4	Ammonium healthy 1	Ammonium healthy 2	Ammonium healthy 3	Ammonium healthy 4	Ammonium diseased 1	Ammonium diseased 2	Ammonium diseased 3	Ammonium diseased 4	Total
K02552	menF	101.042	128.323	135.306	123.009	87.0683	94.1144	91.7258	86.4381	133.332	135.24	128.395	193.454	80.4011	68.4122	80.6039	83.9623	1750.83
K02361	entC	42.0762	41.7476	47.3178	40.8909	42.5451	35.0287	37.87	35.0947	29.1469	27.9025	26.0384	28.1199	33.8738	37.0143	42.9748	35.7552	583.397
K04782	pchB	16.9744	22.6995	19.8311	30.1525	17.655	15.3293	16.6208	22.1975	15.6986	23.1717	18.6092	13.0648	24.5309	25.7461	31.3085	19.5533	333.143
K02363	entE, dhbE, vibE, mxcE	15.4601	17.2431	20.3303	17.9876	13.8663	22.4729	16.049	22.8518	21.4718	16.0467	21.6258	14.6211	14.5738	12.023	10.6422	14.9608	272.226
K00216	entA	4.95336	8.57182	6.56024	11.2218	8.2892	8.02203	8.51493	12.0416	6.38583	6.49064	5.16889	8.97083	6.15586	7.16132	4.1828	5.801	118.492
K04789	mbtE	9.46297	5.8489	11.6752	6.95569	6.48209	7.14468	8.49043	4.89993	5.12529	6.8404	5.3695	3.63631	3.96323	6.84193	6.32054	4.40993	103.467
K12240	pchF	9.96124	5.9243	11.7102	6.92249	5.5171	7.4694	5.92474	11.0617	4.03933	6.19243	7.78634	3.41657	4.50087	4.01673	3.32341	4.32419	102.091
K04788	mbtB	6.687	4.25261	7.78465	6.09757	8.62165	10.3008	10.8292	5.2609	5.28024	2.06601	4.31423	2.6005	4.7456	6.11631	5.53298	3.69588	94.1862
K04792	mbtF	6.30752	4.28545	2.99974	2.73255	10.7203	7.40776	8.22345	6.46711	4.24254	5.66461	3.97607	4.80778	6.26611	5.6855	6.71223	6.27028	92.7691
K24108	asbA	6.63349	3.85533	4.39878	3.35417	5.92068	3.76364	3.64231	5.24727	3.07579	1.59886	2.63927	5.66787	7.64725	6.9844	10.9545	9.2633	84.6469
K04780	dhbF	8.34736	4.63118	5.69506	2.66576	4.64134	6.33774	1.32897	3.36057	8.21729	6.90129	12.8363	6.54	2.96979	2.52874	2.27988	4.81307	84.0943
K02364	entF	2.95994	3.96308	5.87882	2.00959	8.17554	7.90824	15.6117	7.49295	2.07915	2.15504	2.29333	3.29954	2.61413	4.17391	2.77837	3.80018	77.1935
K24109	asbB	1.41694	7.48209	4.60194	5.81708	5.83532	4.00435	2.55027	3.59285	3.28083	2.6644	4.22607	3.92583	7.57513	4.27322	5.9812	6.64712	73.8747
K01252	entB, dhbB, vibB, mxcF	3.01495	4.46839	3.7399	1.28093	3.88297	6.28668	4.51191	3.29383	1.19973	3.35094	2.58937	1.9313	5.52155	3.96187	4.04256	1.32209	54.399
K02362	entD	0	2.38971	2.44298	1.13967	5.63069	2.27329	1.10341	5.13199	0.159631	0.519019	1.13177	0.845831	7.7826	5.11125	10.5898	6.10748	52.3591
K24112	asbE	1.26296	4.50857	2.71091	3.54834	4.31964	2.09193	3.17397	3.3267	1.09137	1.8251	0.863729	1.37057	4.33838	5.27293	3.89083	6.09057	49.6865
K09483	quiC	3.29199	5.96587	5.01402	2.35758	3.49037	2.90023	2.86383	4.44448	2.4676	2.18135	0.264819	0.475867	3.93011	3.34676	2.48758	3.36783	48.8503
K04791	mbtD	1.33006	2.74957	6.26843	3.57928	2.7488	4.78099	1.34939	2.14594	2.77997	3.54582	1.80418	2.77325	1.82341	4.50074	2.49304	2.74559	47.4184
K15652	asbF	2.07826	1.50464	2.36349	2.59831	6.00913	2.00891	1.81115	2.35026	1.40173	0.169989	0.988453	1.0002	2.83851	4.27085	5.61151	8.4016	45.407
K15653	mxcG	3.1506	3.02014	5.06302	1.98036	1.838	1.0228	2.01448	1.93054	3.11177	2.68927	4.51528	3.09151	1.16601	2.61196	2.08922	2.59079	41.8857
K04793	mbtG	2.5582	2.96789	5.33659	1.61129	4.14132	3.28806	3.29694	1.82106	3.06471	1.23881	2.07614	2.52891	1.3763	1.85456	2.23889	2.29106	41.6907
K04787	mbtA	3.37897	1.92965	4.85986	3.48418	1.92625	3.67521	1.58584	2.68175	2.80548	1.2278	1.98381	1.75468	2.27578	0.318772	1.78314	2.62918	38.3004
K24110	asbC	1.80417	2.59539	2.85355	0.530835	2.79675	1.87083	3.15845	1.72756	0	0.0689577	0.172778	1.71217	2.44876	2.15821	4.62891	3.31084	31.8382
K04781	mbtI, irp9, ybtS	1.85146	1.28992	2.83773	1.3835	0.858529	4.53712	1.72905	3.30224	0.451634	0.360964	1.09559	0.789655	0.763652	0.275355	5.8438	1.88782	29.258
K04784	irp2, HMWP2	0.355769	0.364892	1.20633	0.184923	2.12183	1.31234	1.47047	1.57108	0.49941	0.437695	0.254512	0.786029	0.576749	1.42805	0.391785	1.47448	14.4363
K12241	pchG	1.43243	1.11436	0.849937	0.485059	1.16464	1.90206	0.543905	1.88931	0.230578	1.40253	0.40363	0.998833	0.83488	0.139697	0.372799	0	13.7646
K04786	irp1, HMWP1	1.86343	1.07758	1.58662	0	0	0.511878	1.35851	0.0841337	0.306655	0	0	0.274895	1.86223	0.35666	1.22573	0.954977	11.4633
K04790	mbtC	1.5581	0.998967	1.5339	0	0	0.895956	0.935306	0	0.221128	0.239656	0.255276	0.519801	1.07122	0.480759	0.471553	1.88744	11.0691
K01851	pchA	0.757532	0.736714	1.38743	0.270106	0.268172	0.561072	0.100958	0.291402	0.933663	0	0	1.13249	0.353457	0.734371	0.316404	0.579377	8.42315
K15681	mxcL	0	0.603336	1.26121	0.611526	0.539528	0	0.769524	0	0.267105	0.289486	0	0.28306	0.214038	0	0	0	4.83881
K04783	irp5, ybtE	0	0	0	0	0	0	0	0	0	0.696144	0	0	0	0	0	0	0.696144
K12239	pchE	0	0	0	0	0	0	0	0	0	0	0	0	0.485632	0	0	0	0.485632
Note
Columns list per-sample normalized values for four biological replicates in each treatment (pot Experiment 1). “Total” is the sum across all 16 metagenomes. KOs map to canonical siderophore biosynthetic modules within ko01053 (entA–F/menF for enterobactin, asbA–F for petrobactin, mbtA–G for mycobactin, pchA–G for pyochelin, and irp/ybt for yersiniabactin). Pathway definitions follow the KEGG entr…

## Sheet: Table 8
Supplementary Table 8. Taxonomic annotations of KOs in pathway ko01053 (biosynthesis of siderophore group nonribosomal peptides) across nitrogen supply form and disease status
Phylum	Class	Order	Family	Genus	Nitrate healthy 1	Nitrate healthy 2	Nitrate healthy 3	Nitrate healthy 4	Nitrate diseased 1	Nitrate diseased 2	Nitrate diseased 3	Nitrate diseased 4	Ammonium healthy 1	Ammonium healthy 2	Ammonium healthy 3	Ammonium healthy 4	Ammonium diseased 1	Ammonium diseased 2	Ammonium diseased 3	Ammonium diseased 4	Total
Actinobacteria	Actinomycetia	Propionibacteriales	Nocardioidaceae	Nocardioides	72.4653	75.2968	75.4313	74.6246	65.0147	71.8235	68.209	69.7899	95.7819	83.0642	105.375	95.2242	65.5314	60.4812	60.3301	72.4513	1210.89
Actinobacteria	Actinomycetia	Corynebacteriales	Mycobacteriaceae	Mycobacterium	27.5062	41.2705	42.8923	39.4152	24.8788	23.8587	21.3628	22.3837	45.9591	45.4492	33.13	83.1279	16.996	19.4578	21.8004	20.1757	529.664
Actinobacteria	Actinomycetia	Corynebacteriales	Mycobacteriaceae	Mycolicibacterium	15.3039	10.4392	20.3896	13.8937	16.5871	16.7559	13.8515	12.712	11.9653	8.43305	10.4188	10.6801	10.723	12.1825	12.9731	13.9658	211.275
Actinobacteria	Actinomycetia	Micrococcales	Microbacteriaceae	Microbacterium	8.26996	7.07349	9.54217	5.93457	11.7547	18.7535	14.2849	6.30763	3.31006	7.91614	6.62944	4.37647	6.23982	13.0281	9.38233	5.98277	138.786
Actinobacteria	Thermoleophilia	Solirubrobacterales	Solirubrobacteraceae	Solirubrobacter	7.75773	7.46172	13.5701	8.91554	8.9096	6.17993	10.6339	7.78857	2.89407	3.40775	1.84702	3.94622	9.9151	4.83889	9.82654	7.41299	115.306
Actinobacteria	Actinomycetia	Micrococcales	Micrococcaceae	Arthrobacter	10.0604	6.84768	14.7795	7.96524	8.99557	6.54955	7.80724	4.30061	5.66454	10.5901	8.71424	8.18013	2.78487	2.94686	3.80593	2.74487	112.737
Actinobacteria	Acidimicrobiia	Acidimicrobiales	Ilumatobacteraceae	Ilumatobacter	3.50275	11.4455	6.88894	11.0197	2.18775	4.64305	3.93589	2.15679	6.12646	6.75465	4.94357	8.03549	3.92436	2.27039	1.45114	5.2552	84.5416
Actinobacteria	Actinomycetia	Streptomycetales	Streptomycetaceae	Streptomyces	4.9184	5.66262	6.98464	7.35416	4.72236	3.2006	4.47357	4.72418	2.94451	3.87292	8.04733	4.55089	3.5867	4.68375	5.37321	5.81708	80.9169
Proteobacteria	Gammaproteobacteria	Cellvibrionales	Cellvibrionaceae	Cellvibrio	8.78648	5.33004	15.7621	1.84517	3.87495	5.35759	3.92614	5.41193	3.22465	4.14308	4.66554	3.7321	3.91801	1.43514	2.3793	1.60081	75.393
Proteobacteria	Alphaproteobacteria	Sphingomonadales	Sphingomonadaceae	Sphingomonas	3.11301	7.79021	9.56668	5.99536	10.1682	1.87242	5.67518	3.99849	0	0.525235	0	1.69352	7.47993	3.35879	3.30376	7.77987	72.3206
Actinobacteria	Actinomycetia	Pseudonocardiales	Pseudonocardiaceae	Saccharomonospora	2.66277	4.41295	3.3425	5.08183	1.81601	2.38869	3.59858	1.94246	7.21479	12.2433	7.45452	6.06664	1.57176	6.69258	2.30344	2.88678	71.6796
Actinobacteria	Actinomycetia	Micrococcales	Microbacteriaceae	Agromyces	0.178101	0.147905	0	0	6.35189	13.9344	15.4296	5.85049	0	0	0	0	3.20424	3.34685	2.13958	2.45021	53.0333
Proteobacteria	Alphaproteobacteria	Hyphomicrobiales	Phyllobacteriaceae	Mesorhizobium	3.07207	4.77117	7.30926	2.68288	3.71168	4.21231	1.71122	1.52867	3.23011	4.42128	4.27993	2.43584	3.68875	1.43592	0.998615	1.44583	50.9355
Proteobacteria	Alphaproteobacteria	Rhodobacterales	Rhodobacteraceae	Amaricoccus	0.661329	1.83821	2.50456	3.33825	4.52868	1.95038	3.58149	2.86859	3.61204	1.17226	0.343475	2.1165	3.16348	5.70535	2.34048	4.43187	44.1569
Proteobacteria	Deltaproteobacteria	Myxococcales	Sandaracinaceae	Sandaracinus	1.81617	2.35474	1.92026	5.834	1.58208	2.04507	0	3.55164	3.06502	3.26864	3.94316	2.38415	1.70488	5.69477	0.918288	0.491163	40.574
Actinobacteria	Actinomycetia	Streptosporangiales	Streptosporangiaceae	Nonomuraea	3.26991	7.1763	2.53035	3.91878	6.20492	5.20703	2.70467	3.13827	0	0	0.0994233	0	0.596623	1.28306	1.7103	0.843368	38.683
Proteobacteria	Alphaproteobacteria	Hyphomicrobiales	Devosiaceae	Devosia	5.21227	3.22427	2.9979	0.288618	1.64224	4.16355	4.55384	4.39976	1.25709	0.668011	0	1.9606	3.05838	2.9158	0.195308	0.612895	37.1505
Proteobacteria	Alphaproteobacteria	Hyphomicrobiales	Rhizobiaceae	Rhizobium	1.18903	2.58948	2.10131	3.18	4.58081	1.96794	1.953	3.80191	0.671528	1.52783	0	2.08893	2.42192	2.10616	2.44688	3.67259	36.2993
Actinobacteria	Actinomycetia	Micrococcales	Cellulomonadaceae	Cellulomonas	1.03002	2.04693	1.73164	7.60858	3.09268	1.1387	3.08654	1.29037	2.31916	0.392457	0.858656	0.55693	2.36575	1.78942	4.1922	0.31224	33.8123
Actinobacteria	Actinomycetia	Propionibacteriales	Nocardioidaceae	Aeromicrobium	1.40855	2.85689	4.64816	3.17195	0.597153	0.57527	1.20224	0.43771	2.77761	4.10255	3.45786	5.30669	0.933244	0	0.881748	0.140559	32.4982
Proteobacteria	Alphaproteobacteria	Hyphomicrobiales	Rhizobiaceae	Agrobacterium	1.05064	2.22799	1.98006	0.804535	0.653004	1.14939	0.975066	1.90879	3.60434	2.92982	2.06436	5.42272	0.917064	0.767684	2.5442	2.30456	31.3042
Proteobacteria	Gammaproteobacteria	Pseudomonadales	Pseudomonadaceae	Pseudomonas	0.907192	1.04323	1.12972	2.07871	3.26038	1.1452	1.28737	4.20076	0.688604	0.519019	1.39393	0.845831	4.0138	2.49552	3.06533	2.74902	30.8236
Bacteroidota	Flavobacteriia	Flavobacteriales	Flavobacteriaceae	Confluentibacter	1.67299	1.2926	1.85776	0	1.9193	2.05771	0	2.92173	0.545002	1.1563	0.140275	0.577557	6.37328	3.89922	2.20781	3.46923	30.0908
Actinobacteria	Actinomycetia	Propionibacteriales	Nocardioidaceae	Marmoricola	1.98786	2.41274	5.30905	3.18528	1.38705	1.75533	0.274846	2.84915	0	0.153885	0	0.0764414	1.07513	3.04943	4.51721	1.7327	29.7661
Actinobacteria	Actinomycetia	Pseudonocardiales	Pseudonocardiaceae	Amycolatopsis	0.975843	0.496501	1.38424	2.15918	0.47733	1.54859	0.367539	0.830734	4.59242	3.74389	2.89104	7.6337	0.672096	0.728514	0.534757	0.613453	29.6498
Proteobacteria	Gammaproteobacteria	Xanthomonadales	Rhodanobacteraceae	Dokdonella	4.31844	2.16826	2.3593	1.1625	1.12004	2.17583	0.634557	1.92566	1.41756	1.4181	1.18734	0.978472	1.30729	1.70213	1.44211	1.95169	27.2693
Actinobacteria	Actinomycetia	Micrococcales	Micrococcaceae	Pseudarthrobacter	2.32822	2.10614	2.34604	0.359203	2.40662	1.96616	2.31417	3.00587	0.657832	0.872824	0	0	2.48007	2.25587	1.29371	2.51019	26.9029
Candidatus_Tectomicrobia	unclassified_p__Candidatus_Tectomicrobia	unclassified_p__Candidatus_Tectomicrobia	unclassified_p__Candidatus_Tectomicrobia	Candidatus_Entotheonella	1.45173	3.71913	1.55777	4.43577	0.781658	1.47932	1.48929	0.861308	1.68083	0.82295	1.52867	0.999895	1.69349	0.936644	0.494883	1.53989	25.4732
Actinobacteria	Actinomycetia	Micrococcales	Intrasporangiaceae	Pedococcus	0.556846	1.99337	1.31652	1.89915	1.64999	2.24773	2.94107	1.62223	1.07723	1.62778	1.53037	2.80844	0.409678	0.567454	1.58664	0.931286	24.7658
Proteobacteria	Alphaproteobacteria	Hyphomicrobiales	Rhizobiaceae	Ensifer	1.06138	1.94043	1.937	4.36522	0.792727	0.784234	0.538116	0.225428	2.92639	2.51712	1.20099	3.31102	0.281399	0.926156	0.254738	1.21983	24.2822
Actinobacteria	Actinomycetia	Pseudonocardiales	Pseudonocardiaceae	Pseudonocardia	0.792884	1.32131	1.06567	0.231238	1.36174	3.66126	2.41564	1.42264	0	0.22045	0.0949268	0	2.49049	2.38676	4.28048	2.50133	24.2468
Actinobacteria	Actinomycetia	Geodermatophilales	Geodermatophilaceae	Blastococcus	0.758932	1.96993	1.20674	0.485059	0.794631	1.13509	2.56322	1.97583	1.40004	1.28356	2.64502	3.79894	0.302567	0.331655	0.137022	0.336942	21.1252
Bacteroidota	Cytophagia	Cytophagales	Marivirgaceae	Marivirga	2.53739	0.761213	1.20998	0.420164	0	0.756407	0	1.56528	2.07101	2.41834	2.87677	2.00402	0.637494	0	0.918977	1.15668	19.3337
Actinobacteria	Actinomycetia	Micromonosporales	Micromonosporaceae	Virgisporangium	4.11689	1.7157	1.25879	1.18571	1.47303	0.467294	0.718693	0.369866	0	0.77416	0.674658	1.06091	1.13875	2.9376	0.716485	0.544802	19.1533
Proteobacteria	Alphaproteobacteria	Sphingomonadales	Sphingomonadaceae	Sphingopyxis	0.94204	0.928917	3.16921	0.753221	2.52544	2.29027	0.72606	1.52364	0.822489	0.621282	1.03667	0.348647	0.729674	0.468108	0	0.974406	17.8601
Proteobacteria	Alphaproteobacteria	Hyphomicrobiales	Phyllobacteriaceae	Aminobacter	0.627727	1.86954	0.852799	1.10293	2.23654	0.74999	2.02485	1.54329	0	0.174036	0	0	2.17166	0.752306	2.30745	1.19705	17.6102
Proteobacteria	Gammaproteobacteria	Xanthomonadales	Xanthomonadaceae	Lysobacter	0.820688	0.882639	0.805027	0.109511	2.33722	1.45963	0.245593	1.59496	0	0	0	0.521807	1.34413	2.00088	3.64672	1.78134	17.5501
Proteobacteria	Alphaproteobacteria	Hyphomicrobiales	Nitrobacteraceae	Bradyrhizobium	1.27019	0.478819	0	1.96591	0	1.36422	0	7.55353	0.114312	0	0	0	0.706192	0.744244	1.12162	2.1797	17.4987
Cyanobacteria	unclassified_p__Cyanobacteria	Oscillatoriales	Microcoleaceae	Microcoleus	2.90007	1.72695	0.824979	0.403687	1.11079	1.47826	0.50336	1.01649	0.881622	1.71989	1.1112	0.373713	0.755428	1.04636	0.722531	0.310516	16.8858
Actinobacteria	Actinomycetia	Micrococcales	Microbacteriaceae	Pseudolysinimonas	1.08672	0.0870528	0	0.144986	0.657878	0.382807	0.100958	4.04369	0	0	0.501516	0	1.81858	0.326771	4.17022	3.39113	16.7123
Bacteroidota	Cytophagia	Cytophagales	Cyclobacteriaceae	Algoriphagus	1.04438	1.08283	0.208656	1.09298	0.573297	1.38696	1.43267	0.183733	0.595095	0.304563	0.295163	0.840855	1.47875	2.15123	1.3854	2.18092	16.2375
Proteobacteria	Alphaproteobacteria	Rhodobacterales	Roseobacteraceae	Roseobacter	0.671361	0	0.64986	0.701865	2.05543	1.22746	3.57412	1.26386	0	0	0	0	2.13496	0.420608	1.77182	1.20479	15.6761
Actinobacteria	Actinomycetia	Micromonosporales	Micromonosporaceae	Actinoplanes	1.95822	0.527603	0.265207	2.10529	0.226904	0	0	0.201514	1.57199	1.7927	2.71871	1.48946	0	0.430357	0.211058	1.98708	15.4861
Actinobacteria	Actinomycetia	Streptosporangiales	Thermomonosporaceae	Actinomadura	2.13517	0.512075	3.76905	0	0.214856	0.263098	0	1.67635	1.4204	0.73649	2.15641	0.476485	0.949516	0	0.436187	0	14.7461
Bacteroidota	Cytophagia	Cytophagales	Spirosomaceae	Dyadobacter	0	0.95214	0	1.19981	0.252904	1.66793	1.08214	0.981087	2.12466	0.304563	1.10475	1.48901	0.20066	0.833817	0.508393	1.23721	13.9391
Thaumarchaeota	Nitrososphaeria	Nitrososphaerales	Nitrososphaeraceae	Candidatus_Nitrosocosmicus	0.395764	0	0.332216	0.609515	0.514006	0.160557	0	0	0	0	0	0	3.05892	0.442537	5.61602	2.0143	13.1438
Actinobacteria	Actinomycetia	Propionibacteriales	Propionibacteriaceae	Microlunatus	0	0.899244	0	1.74171	1.39097	0	2.64352	0.694103	0.796215	0.812168	1.34932	0.941624	0.267547	1.15808	0	0	12.6945
Proteobacteria	Gammaproteobacteria	Chromatiales	Halothiobacillaceae	Halothiobacillus	1.12874	0.268445	3.16317	1.32424	0.224803	0.137924	0.582127	0.341446	0.465614	0.128802	1.13615	2.72425	0	0.235085	0.472909	0.104645	12.4383
Proteobacteria	Alphaproteobacteria	Hyphomicrobiales	Rhizobiaceae	Mycoplana	0	0	0	0	0.231226	1.49089	0	1.66585	0	0	0	0	0.733844	1.01646	6.97899	0.226233	12.3435
Proteobacteria	Alphaproteobacteria	Rhodospirillales	Azospirillaceae	Skermanella	0.275797	1.47905	0.275507	0	0.942865	0.911903	1.3448	0.727797	0	0	0	0	1.30916	1.29525	2.54089	0.922503	12.0255
Actinobacteria	Actinomycetia	Streptomycetales	Streptomycetaceae	Kitasatospora	0.240738	0.891849	1.30636	0.294115	0.962198	0.265328	0	0.63528	1.56185	1.91853	1.98052	0.264714	0.718556	0	0.674145	0	11.7142
Cyanobacteria	unclassified_p__Cyanobacteria	Nostocales	Nostocaceae	Nostoc	0.434802	0.762288	6.27266	0	0	0	0.176677	0.637441	0.550564	0.149174	0.722848	0.583451	0.0982827	1.13747	0	0	11.5257
Actinobacteria	Actinomycetia	Kineosporiales	Kineosporiaceae	Kineosporia	0.10968	0.352917	0.945907	0.119236	1.68733	0.483532	0.802207	1.64012	1.3159	0	0.656424	0.551913	0.916065	0.515099	0.202094	1.19231	11.4907
Proteobacteria	Deltaproteobacteria	Myxococcales	Polyangiaceae	Sorangium	0.575042	1.11019	0	0.661031	0.772705	0.253512	0.42059	0.20233	1.07704	1.06535	1.55721	1.05885	0.233968	0.247057	0.211913	0.975966	10.4228
Proteobacteria	Alphaproteobacteria	Hyphomicrobiales	Rhizobiaceae	Sinorhizobium	1.23879	2.21587	0.777366	0.890016	0.254228	1.14744	0.362603	0.915779	0.65431	0	0	0.149681	0	1.12645	0	0.357255	10.0898
Actinobacteria	Actinomycetia	Corynebacteriales	Gordoniaceae	Gordonia	1.06427	1.59639	0.2326	0.605531	0.2639	0.840644	0	0	0.221128	0.479312	0.742319	0	1.322	0.523179	0.955527	1.12361	9.97041
Actinobacteria	Actinomycetia	Micrococcales	Intrasporangiaceae	Phycicoccus	0	0.269633	0.755619	0.273293	1.56075	0	1.91885	0.227161	0	0.343977	0.333361	1.94898	0.679885	0.47225	0.934686	0	9.71845
Bacteroidota	Flavobacteriia	Flavobacteriales	Flavobacteriaceae	Mariniflexile	0.141329	0.737517	1.3964	1.87386	0	0.231916	0.677531	0	1.00514	1.92152	0.244273	0.572569	0.376901	0	0	0.444865	9.62383
Firmicutes	Bacilli	Bacillales	Bacillaceae	Caldibacillus	0	0	0	0	0.738289	2.62765	1.074	3.07759	0	0	0	0	0.638575	0.722075	0.485505	0.187782	9.55146
Proteobacteria	Alphaproteobacteria	Rhodospirillales	Rhodospirillaceae	Magnetospirillum	0	0	0	0	0.630978	4.0575	1.0359	1.04674	0	0.339977	0	0	0.866298	0.114026	1.01569	0.414322	9.52143
Bacteroidota	Flavobacteriia	Flavobacteriales	Flavobacteriaceae	Aquaticitalea	0.330315	0.708569	0.494951	0.897735	0.846934	0.546082	0	1.8886	0.94108	0.509966	0	0.831078	0.33599	0.465386	0.510389	0.138107	9.44519
Verrucomicrobia	Verrucomicrobiae	Verrucomicrobiales	Verrucomicrobiaceae	Luteolibacter	0	0	0	0	1.34526	0	0.456842	0.988959	0	0	0	0	1.57563	0.563211	3.38361	0.940149	9.25367
Proteobacteria	Alphaproteobacteria	Rhodobacterales	Roseobacteraceae	Leisingera	0.609097	3.58041	0.375857	0	2.25816	0	0.749654	0	0	0.239656	0	0.468673	0	0.448439	0.219926	0	8.94987
Proteobacteria	Gammaproteobacteria	Xanthomonadales	Xanthomonadaceae	Stenotrophomonas	1.54973	0.998566	0.260341	0.275733	0	0.279542	0	0	1.62955	0.965425	1.01805	1.12221	0	0	0.701015	0.142242	8.9424
Firmicutes	Bacilli	Bacillales	Paenibacillaceae	Xylanibacillus	0	0	0	0	1.12154	0.169236	7.37968	0	0	0	0	0	0.176318	0.0672094	0	0	8.91398
Actinobacteria	Actinomycetia	Micrococcales	Promicromonosporaceae	Cellulosimicrobium	0.202908	1.74106	0.810777	1.5441	0	0.6709	1.48408	0	0	0.417687	0	0.612623	0.275192	0	0.186937	0.848373	8.79464
Actinobacteria	Actinomycetia	Pseudonocardiales	Pseudonocardiaceae	Crossiella	1.00208	0	1.61272	0.280746	1.67915	0.440572	0	0.703247	0.735753	0	0.156551	0	1.59288	0	0.47584	0	8.67953
Bacteroidota	Flavobacteriia	Flavobacteriales	Flavobacteriaceae	Flavobacterium	0.767759	1.11992	0.567544	1.5441	0	0.211545	0.81424	0.749631	0	0.292381	1.7078	0	0	0	0	0.237544	8.01247
Proteobacteria	Gammaproteobacteria	Chromatiales	Chromatiaceae	Rheinheimera	2.46232	0	0	0	0	0.246525	0	1.2084	0	0.460442	0	0.225111	1.45253	0.976321	0.263614	0.579463	7.87473
Actinobacteria	Actinomycetia	Corynebacteriales	Nocardiaceae	Rhodococcus	0	0	0	0.127087	0.199825	0	0.142505	0.10283	0	0	0	0	1.03055	0.329409	4.63112	1.27081	7.83414
Proteobacteria	Alphaproteobacteria	Hyphomicrobiales	Methylobacteriaceae	Methylobacterium	0.267991	0.862316	0.267709	1.4062	0.229045	1.84169	0.65337	0	0	0.827492	0	0.786855	0.256845	0	0.348949	0	7.74846
Proteobacteria	Betaproteobacteria	Burkholderiales	Comamonadaceae	Hydrogenophaga	0.557001	0.491427	1.09738	0.498098	0	0.504979	0	0.604541	0.717147	0.286648	2.15818	0.510842	0	0	0	0	7.42624
Actinobacteria	Actinomycetia	Nakamurellales	Nakamurellaceae	Nakamurella	0.671033	0.260414	0.670328	1.47978	0	0.802787	0	0	0	0	0	0	0.645614	0.228052	0.206073	2.38839	7.35247
Verrucomicrobia	Verrucomicrobiae	Verrucomicrobiales	Verrucomicrobiaceae	Verrucomicrobium	0.989035	0	0.823965	0.357018	0	0.423678	0.536878	0	1.09521	1.13326	0.547236	0.661019	0	0.154232	0	0.549236	7.27076
Bacteroidota	Flavobacteriia	Flavobacteriales	Crocinitomicaceae	Fluviicola	0.511839	1.72793	0	0	0	1.20418	0	0.192213	0	0	0	0	0.668813	0.820989	1.2079	0.730906	7.06477
Cyanobacteria	unclassified_p__Cyanobacteria	Pseudanabaenales	Prochlorotrichaceae	Nodosilinea	0.350705	0.47607	0	0	0.379356	0.489198	0.106878	0	0	0	0	0	1.8431	0.741171	1.13085	1.46632	6.98366
Verrucomicrobia	Opitutae	Opitutales	Opitutaceae	Lacunisphaera	0.50125	5.02381	0.741888	0.299826	0	0	0	0	0	0	0.275103	0	0	0	0	0	6.84187
Verrucomicrobia	Opitutae	Puniceicoccales	Puniceicoccaceae	Pelagicoccus	0	0	0	0.305763	0.699495	0	0	0	0	0	0	0	1.50299	0.938854	1.03648	2.25708	6.74067
Actinobacteria	Actinomycetia	Pseudonocardiales	Pseudonocardiaceae	Actinophytocola	0	0	0	0	0.263327	0.339574	0.150233	0.325219	0	0	0	0	1.42073	0.694546	2.32759	1.13362	6.65484
Verrucomicrobia	Opitutae	Opitutales	Opitutaceae	Oleiharenicola	0	2.72837	2.90634	0	0.161858	0	0	0	0	0	0	0	0	0.6798	0	0.158363	6.63473
Actinobacteria	Actinomycetia	Jiangellales	Jiangellaceae	Jiangella	0	0	0	0	0.956764	0	0	0.599705	0	0	0	0	0.758911	1.28016	1.81311	1.03386	6.44252
Actinobacteria	Acidimicrobiia	Acidimicrobiales	Iamiaceae	Rhabdothermincola	1.24858	1.9262	0.528768	0	0	0	0	0	0.670252	0.363206	0.351996	0.88786	0	0.16995	0.162554	0	6.30936
Actinobacteria	Actinomycetia	Micrococcales	Intrasporangiaceae	Knoellia	0.381303	0.887432	1.80508	0	0.592757	0	0	0.183733	0.442977	1.15641	0.190172	0	0.187023	0.392384	0	0	6.21928
Firmicutes	Bacilli	Bacillales	Bacillaceae	Alkalihalobacillus	0	0.184658	0.171983	0.450833	0	0.18975	0.20987	0	0.163501	1.42148	0.515194	2.18544	0.281218	0	0	0.431899	6.20583
Proteobacteria	Betaproteobacteria	Burkholderiales	Comamonadaceae	Kinneretia	0.82739	0	0	0	0.49048	0.632499	0.726182	0.759788	0	0	0	0	0.187023	1.5785	0	0.978032	6.17989
Proteobacteria	Gammaproteobacteria	Enterobacterales	Enterobacteriaceae	Enterobacter	0	0	0	0	0.242788	0	0	0.249877	0.269776	0	0	0	1.34844	1.06729	2.35541	0.475089	6.00866
Proteobacteria	Gammaproteobacteria	Chromatiales	Ectothiorhodospiraceae	Nitrococcus	0	0	0	0	0.942865	0	0	1.21299	1.05108	0.379715	1.10399	0.371287	0.500348	0	0	0.308499	5.87077
Proteobacteria	Gammaproteobacteria	Xanthomonadales	Rhodanobacteraceae	Rhodanobacter	0.247018	0.264943	0	0.53708	0.844479	0.544499	0.301118	1.73827	0	0.254244	0.246397	0	0.837539	0	0	0	5.81559
Cyanobacteria	unclassified_p__Cyanobacteria	Oscillatoriales	Coleofasciculaceae	Allocoleopsis	0.207351	2.66877	0.414266	0.225417	0.531652	0.685592	0	0	0.196917	0.213416	0	0.208679	0.421826	0	0	0	5.77389
Actinobacteria	Actinomycetia	Streptosporangiales	Streptosporangiaceae	Streptosporangium	0	0	0	0	0	0.172026	0	1.61634	0	0	0	0	0.614851	0	1.95565	1.40842	5.76728
Actinobacteria	Actinomycetia	Motilibacterales	Motilibacteraceae	Motilibacter	0.277142	0	0	0.301289	1.0659	0	0.50676	0.121891	0.394794	0.427874	0.276445	0.976212	0.563807	0.39047	0	0.463501	5.76608
Proteobacteria	Alphaproteobacteria	Hyphomicrobiales	Rhizobiaceae	Shinella	0.425574	0.684685	0.584549	0.404821	1.13665	0.879457	0.194543	0.889075	0	0	0	0	0.252517	0.0999331	0.147029	0.044484	5.74331
Chloroflexi	Thermomicrobia	Sphaerobacterales	Sphaerobacteraceae	Sphaerobacter	0	0	0.530415	0	0.505808	0	0.360715	0	0	0	0	0	1.10082	0.249366	1.36308	1.55403	5.66424
Proteobacteria	Alphaproteobacteria	Sphingomonadales	Sphingosinicellaceae	Sphingosinicella	0.516492	0.603336	0	0.611526	0.524946	0	0.374363	0	0.267105	1.0797	0	1.06276	0	0.48513	0	0	5.52537
Proteobacteria	Gammaproteobacteria	Xanthomonadales	Rhodanobacteraceae	Pinirhizobacter	0.585713	0	1.17019	0.318372	1.48646	0	0	1.54037	0.27812	0	0	0	0	0	0	0	5.37923
Actinobacteria	Actinomycetia	Micrococcales	Microbacteriaceae	Homoserinimonas	0	0	0	0	1.14253	0	0.814791	0.391964	0	0	0	0	0.528799	0.313908	1.23159	0.838392	5.26197
Actinobacteria	Acidimicrobiia	Acidimicrobiales	Ilumatobacteraceae	Desertimonas	0	0.412631	0	0	0	0.943033	0.208606	0.752641	0	0	0.170697	0.429911	0.869898	1.16382	0.196776	0	5.14802
Actinobacteria	Actinomycetia	Streptomycetales	Streptomycetaceae	Yinghuangia	0.526057	0	1.47161	0.431917	0	0.289895	0.484316	0.462735	0.249793	0	0	0	0.0891824	0.494114	0	0.549871	5.04949
Verrucomicrobia	Verrucomicrobiae	Verrucomicrobiales	Verrucomicrobiaceae	Roseimicrobium	0.382723	0	0.147798	1.63636	0.327103	0.163066	0.286187	0.41302	0.421525	0.456845	0	0.446704	0.10033	0	0	0.247442	5.0291
Actinobacteria	Actinomycetia	Pseudonocardiales	Pseudonocardiaceae	Saccharothrix	0	0	0	0.546585	1.24994	0	0.467954	0	0	0	0	0	1.33268	0.360569	0	1.05108	5.00881
Firmicutes	Bacilli	Bacillales	Bacillaceae	Bacillus	3.26346	0.991997	0.244631	0	0	0	0	0	0	0	0	0	0	0	0.121727	0.220972	4.84279
Proteobacteria	Alphaproteobacteria	Rhodobacterales	Rhodobacteraceae	Xinfangfangia	0	0	0	0.551466	0	0.95599	0	0.669313	0	0	0.216303	0.510519	0.343989	0.476467	0.19978	0.848373	4.7722
Actinobacteria	Actinomycetia	Micrococcales	Intrasporangiaceae	Terrabacter	0.835502	0	0	0	0	0	0	0	0	0.286648	0	0	0.377714	0.784769	1.53948	0.931547	4.75566
Proteobacteria	Alphaproteobacteria	Sphingomonadales	Sphingosinicellaceae	Sandaracinobacteroides	0	0	0	0.510482	0.273351	0	1.06833	0	1.3728	0.958625	0	0	0.315794	0	0	0.168471	4.66785
Actinobacteria	Actinomycetia	Micromonosporales	Micromonosporaceae	Micromonospora	1.24866	0.334819	0	1.35745	0.2668	0	0	0	0	0.642595	0	0	0.423372	0	0.287596	0	4.5613
Actinobacteria	Thermoleophilia	Solirubrobacterales	Conexibacteraceae	Conexibacter	0	0	0	0.193013	0	0.782717	0	0.863372	0	0.679955	0.219656	1.1081	0.485632	0.166763	0	0	4.49921
Actinobacteria	Actinomycetia	Streptosporangiales	Streptosporangiaceae	Planobispora	0	0	0.877645	0.318372	0	0	0.713992	0	0.504823	1.83134	0	0.240244	0	0	0	0	4.48641
Actinobacteria	Actinomycetia	Pseudonocardiales	Pseudonocardiaceae	Actinokineospora	0	0.282116	0.788256	0.57189	0	0.289895	0	0	1.74855	0.270723	0	0	0	0	0.242326	0.219949	4.4137
Bacteroidota	Flavobacteriia	Flavobacteriales	Flavobacteriaceae	Aequorivita	0	0	0.851316	0.791848	0	0.267596	0	0.927504	0	0.249898	0.283356	0	0.164644	0	0.671057	0.203029	4.41025
Actinobacteria	Actinomycetia	Micrococcales	Intrasporangiaceae	Janibacter	0	0	0.329967	0	1.08265	0	0.402658	0	0	0	0	0	0.447986	0.620515	0.558406	0.922503	4.36469
Proteobacteria	Alphaproteobacteria	Sphingomonadales	Sphingomonadaceae	Rhizorhapis	0.624331	0	0.623675	0.339363	0.4002	0	0.190267	0.137295	0.296457	0.963892	0.311381	0.157083	0	0.146605	0	0.130519	4.32107
Bacteroidota	Cytophagia	Cytophagales	Hymenobacteraceae	Pontibacter	0.43041	0	1.07762	0.390912	0	0.396312	0	0.694901	0	0	0	0	0	0	0.396534	0.902067	4.28875
Cyanobacteria	unclassified_p__Cyanobacteria	Oscillatoriales	Cyanothecaceae	Cyanothece	0.197271	1.26952	0	0	0.67441	0	0.240476	0.347051	0	0.203042	0.833401	0.198535	0.133774	0.185293	0	0	4.28277
Actinobacteria	Actinomycetia	Micromonosporales	Micromonosporaceae	Phytohabitans	0	0	0.411264	0.67135	0	0	0	1.08642	0	0	0	0	0.55836	0.193349	0.189646	1.0328	4.14319
Bacteroidota	Flavobacteriia	Flavobacteriales	Flavobacteriaceae	Winogradskyella	0.676359	0.72544	0.337824	1.28675	0	0	0	0.148736	0.160581	0.348072	0	0.340346	0.114663	0	0	0	4.13877
Proteobacteria	Alphaproteobacteria	Caulobacterales	Caulobacteraceae	Brevundimonas	0	0	0	0	0	0	0.597045	0.430822	0	0	0	0	0.498192	0.460037	1.12807	1.0239	4.13806
Actinobacteria	Actinomycetia	Micrococcales	Intrasporangiaceae	Humibacillus	0	0.267267	1.32439	0.270895	0	0	0	0.487875	0.236646	0	0	0	0.800564	0	0.740555	0	4.12819
Proteobacteria	Betaproteobacteria	Burkholderiales	Alcaligenaceae	Pigmentiphaga	0	0	1.57902	0	0	0	0	0	0.729125	0.263406	0.510552	0.772678	0	0	0.235777	0	4.09056
Proteobacteria	Alphaproteobacteria	Hyphomicrobiales	Rhizobiaceae	Neorhizobium	0	0	0	0	0	0.948748	0	0	0	0	0.429328	0	0	0.404275	1.58613	0.719832	4.08832
Actinobacteria	Acidimicrobiia	Acidimicrobiales	Iamiaceae	Aquihabitans	0.232845	0	0.4652	0	0.398013	0.256629	0	0.204817	0	0	0	0	0.47369	0.437412	1.07259	0.389417	3.93061
Proteobacteria	Alphaproteobacteria	Hyphomicrobiales	Boseaceae	Bosea	0.383879	0.290176	0.270259	0.294115	0	0.596356	0	0	0	0	0.539727	1.47545	0	0	0	0	3.84996
Cyanobacteria	unclassified_p__Cyanobacteria	Oscillatoriales	Microcoleaceae	Planktothricoides	0	1.66951	0	0	0.166293	0	1.50559	0	0	0	0	0	0.131941	0	0.179255	0	3.65259
Bacteroidota	Flavobacteriia	Flavobacteriales	Flavobacteriaceae	Sediminicola	0.901812	0	0	0.245096	0.449607	0	0.0916101	0	0	0	0	0	0.917305	0.282351	0.207708	0.439897	3.53539
Proteobacteria	Betaproteobacteria	Burkholderiales	Burkholderiaceae	Burkholderia	0	0	0	0	0.201484	0	0	0.103683	0	0	0	0	0.465631	0.644955	2.04433	0	3.46008
Bacteroidota	Flavobacteriia	Flavobacteriales	Flavobacteriaceae	Aggregatimonas	0	0.870528	0.375857	0	0	0	0	0	0.893299	0.665717	0.56296	0	0	0	0	0	3.36836
Proteobacteria	Betaproteobacteria	Burkholderiales	Comamonadaceae	Acidovorax	0	0	0	0	0.802604	0.258749	0	0.61953	0	0	0	0	0.477605	0.220514	0.865164	0	3.24417
Proteobacteria	Alphaproteobacteria	Sphingomonadales	Sphingomonadaceae	Novosphingobium	0.66063	0.354285	0	0	0	0	0	0.581109	0	0	0	0	0.223993	0.310257	0	1.10486	3.23513
Proteobacteria	Alphaproteobacteria	Rhodobacterales	Roseobacteraceae	Shimia	1.07875	0	0	1.17274	0.307326	0	0	0	0	0.370102	0	0	0	0	0	0.300689	3.2296
Actinobacteria	Actinomycetia	Pseudonocardiales	Pseudonocardiaceae	Lentzea	0	0	0	0	0	0	0.342857	1.23701	0	0	0	0	0	0	1.55473	0	3.1346
Proteobacteria	Deltaproteobacteria	Myxococcales	Myxococcaceae	Myxococcus	0	0	1.05101	0	0	0.386527	0	0	0	0.360964	0	0.352952	0	0	0.646203	0	2.79765
Proteobacteria	Betaproteobacteria	Burkholderiales	Burkholderiaceae	Caballeronia	0.575819	0	0.383476	0	0	0	0	0	0.568938	0	0.858656	0.409753	0	0	0	0	2.79664
Proteobacteria	Gammaproteobacteria	Alteromonadales	Pseudoalteromonadaceae	Pseudoalteromonas	0	0	0	0	0.816093	0	0	0	0	0	0	0	1.13314	0.22422	0.219926	0.399234	2.79261
Actinobacteria	Actinomycetia	Sporichthyales	Sporichthyaceae	Sporichthya	0	0	1.26121	0	0.539528	0	0.769524	0	0	0	0	0	0.214038	0	0	0	2.7843
Actinobacteria	Acidimicrobiia	Acidimicrobiales	Iamiaceae	Iamia	0	0	0	0	0.116166	0	0	0	0.12908	0.419685	0.677886	1.23111	0	0.127666	0	0	2.70159
Proteobacteria	Alphaproteobacteria	Rhodospirillales	Rhodospirillaceae	Ferrovibrio	0	0.81612	0.767077	0	0	0	0	0.91698	0	0	0	0	0.176728	0	0	0	2.67691
Proteobacteria	Alphaproteobacteria	Rhodospirillales	Azospirillaceae	Azospirillum	0	0.196571	0	0	0.469912	0	0.22341	0	0	0.188633	0	0.184446	0	1.37714	0	0	2.64011
Actinobacteria	Actinomycetia	Pseudonocardiales	Pseudonocardiaceae	Solihabitans	0	0.135416	0.252242	0	0.107906	0.417449	0	0.111056	0	0	0	0	0.0856151	0.118587	0.930532	0.422301	2.5811
Actinobacteria	Actinomycetia	Pseudonocardiales	Pseudonocardiaceae	Saccharopolyspora	0	0	0.420403	0.457512	0.179843	0	0	0.185094	0.399668	0.433156	0.209894	0	0.285384	0	0	0	2.57095
Proteobacteria	Gammaproteobacteria	Xanthomonadales	Rhodanobacteraceae	Frateuria	0	0.211587	0.48097	0	0	1.13164	0	0.301057	0.187345	0.203042	0	0	0	0	0	0	2.51564
Proteobacteria	Gammaproteobacteria	Xanthomonadales	Xanthomonadaceae	Xanthomonas	0.223678	0.479819	0	0	0.382343	0	0	0	0.424844	0.230221	0.446231	0.225111	0	0	0	0	2.41225
Actinobacteria	Actinomycetia	Micrococcales	Microbacteriaceae	Salinibacterium	0	0	0	0	0	0.306948	0	0	0	0	0	0	0.377714	0	0.513161	1.16443	2.36226
Actinobacteria	Actinomycetia	Corynebacteriales	Nocardiaceae	Prescottella	0	0	0	0	0	1.18894	0	0.3163	0	0	0.358679	0	0	0.168874	0	0.300689	2.33348
Actinobacteria	Actinomycetia	Streptosporangiales	Streptosporangiaceae	Acrocarpospora	0	0	0	0.305763	0	0	0	0	0	1.73691	0	0.28306	0	0	0	0	2.32574
Bacteroidota	Flavobacteriia	Flavobacteriales	Flavobacteriaceae	Saonia	0	0.213066	0	0.647876	0.169782	0	0	0.349478	0	0	0	0.199924	0.269418	0	0.366031	0	2.21557
Proteobacteria	Deltaproteobacteria	Myxococcales	Archangiaceae	Archangium	0	0	0	0	0	0.869686	0.320635	0	0	0	0	0	0.35673	0	0	0.659846	2.2069
Proteobacteria	Deltaproteobacteria	Myxococcales	Archangiaceae	Stigmatella	0	0	0	1.43162	0	0.265328	0	0	0	0.49556	0	0	0	0	0	0	2.19251
Rhodothermaeota	Rhodothermia	Rhodothermales	Rubricoccaceae	Rubrivirga	0.469538	0	0	0	0	0	0	0	1.56069	0	0	0	0.159202	0	0	0	2.18943
Cyanobacteria	unclassified_p__Cyanobacteria	Oscillatoriales	Coleofasciculaceae	Coleofasciculus	0	0	0	0	0	0	0	0.504802	1.09	0.590668	0	0	0	0	0	0	2.18547
Proteobacteria	Gammaproteobacteria	Oceanospirillales	Halomonadaceae	Halomonas	0	0	0	0.181659	0	0	0	0.293973	0	0	0.16668	0	0	0	1.53948	0	2.1818
Gemmatimonadetes	Longimicrobia	Longimicrobiales	Longimicrobiaceae	Longimicrobium	0	0	0	0	0	0	0	0	0	0	0	0.291725	0	0.544533	1.33527	0	2.17152
Proteobacteria	Deltaproteobacteria	Myxococcales	Archangiaceae	Cystobacter	0	0	0	0	0	0	0	0	0	0.868457	0	0.56612	0	0	0	0.705577	2.14015
Actinobacteria	Actinomycetia	Micrococcales	Intrasporangiaceae	Segeticoccus	0	0	0	0	0.707149	0	0	0	0	0	1.37552	0	0	0	0	0	2.08267
Proteobacteria	Betaproteobacteria	Burkholderiales	unclassified_o__Burkholderiales	Xylophilus	0.338179	0	0.337824	0.367644	0	0	0	0	0.321162	0.696144	0	0	0	0	0	0	2.06095
Cyanobacteria	unclassified_p__Cyanobacteria	Nostocales	Scytonemataceae	Scytonema	0	0	0	0.726637	0	0.736675	0	0.587946	0	0	0	0	0	0	0	0	2.05126
Cyanobacteria	unclassified_p__Cyanobacteria	Synechococcales	Synechococcaceae	Synechococcus	0	0.585932	0	0	0	0	0	0	0.345867	0.374847	0.544916	0	0	0.171039	0	0	2.0226
Proteobacteria	Deltaproteobacteria	Myxococcales	Myxococcaceae	Corallococcus	1.26817	0	0.506736	0	0	0	0	0	0	0	0	0	0	0	0	0.212093	1.987
Actinobacteria	Actinomycetia	Micrococcales	Cellulomonadaceae	Pseudactinotalea	0.86082	0	0	0	0	0	1.08214	0	0	0	0	0	0	0	0	0	1.94296
Actinobacteria	Actinomycetia	Pseudonocardiales	Pseudonocardiaceae	Kutzneria	0	0	0.2326	0.253132	0.597019	0	0.851523	0	0	0	0	0	0	0	0	0	1.93427
Actinobacteria	Actinomycetia	Micrococcales	Microbacteriaceae	Conyzicola	0	0	0	0.205881	0	1.04362	0.230857	0.166585	0	0	0	0	0.128423	0	0	0.158363	1.93373
Chlamydiae	Chlamydiia	Parachlamydiales	Parachlamydiaceae	Candidatus_Protochlamydia	0.145677	0	0	1.26696	0.249013	0	0	0.256284	0	0	0	0	0	0	0	0	1.91793
Actinobacteria	Actinomycetia	Streptosporangiales	Nocardiopsaceae	Nocardiopsis	1.07196	0	0	0.194227	0	0	0	0	0	0	0	0	0.484614	0	0.164599	0	1.9154
Actinobacteria	Actinomycetia	Streptosporangiales	Streptosporangiaceae	Sphaerimonospora	0	0	0	0	1.07906	0	0	0	0	0	0	0	0	0.820989	0	0	1.90005
Proteobacteria	Acidithiobacillia	Acidithiobacillales	Acidithiobacillaceae	Acidithiobacillus	0	0	0	0	0.128459	0.165654	0.36644	0	0.142739	0	0	0.60506	0.101923	0	0	0.377055	1.88733
Cyanobacteria	unclassified_p__Cyanobacteria	Synechococcales	Trichocoleusaceae	Trichocoleus	0.473451	0	0.472953	0	0	0	0	0	0	0	0	0	0	0.889405	0	0	1.83581
Proteobacteria	Gammaproteobacteria	Enterobacterales	Pectobacteriaceae	Pectobacterium	0.281258	0	0.280962	1.22305	0	0	0	0	0	0	0	0	0	0	0	0	1.78527
Bacteroidota	Flavobacteriia	Flavobacteriales	Flavobacteriaceae	Arenibacter	0	0.320721	0	0	0.511132	0.65913	0	0	0	0	0	0	0	0.280865	0	0	1.77185
Actinobacteria	Actinomycetia	Micrococcales	Microbacteriaceae	Leifsonia	0	0	0	0	0.0703733	0	0	0.120714	0	0	0	0	0.111672	0.206239	0.986162	0.20656	1.70172
Actinobacteria	Rubrobacteria	Gaiellales	Gaiellaceae	Candidatus_Gaiellasilicea	0	0	0	0	0	0	0	0	0	0	0	0	0.713459	0.988227	0	0	1.70169
Proteobacteria	Gammaproteobacteria	Enterobacterales	Erwiniaceae	Erwinia	0	0	0	0	0.665172	0	0	1.02689	0	0	0	0	0	0	0	0	1.69206
Verrucomicrobia	Verrucomicrobiae	Verrucomicrobiales	Verrucomicrobiaceae	Haloferula	0	0	0	0	0.4186	0	0.298522	0	0	0	0	0	0.498192	0.460037	0	0	1.67535
Actinobacteria	Actinomycetia	Streptosporangiales	Nocardiopsaceae	Thermobifida	0	0	0	0	0	0	0	0.134342	0	0	0	0	0.103567	0.286905	1.12564	0	1.65046
Actinobacteria	Actinomycetia	Micrococcales	Brevibacteriaceae	Brevibacterium	0	0	0	0.222173	0	0	0	0	0.582251	0.420691	0.407707	0	0	0	0	0	1.63282
Actinobacteria	Actinomycetia	Micrococcales	unclassified_o__Micrococcales	Pengzhenrongella	0.275797	0	0	0	0.235716	0	0	0	0	0.283865	0	0	0.56107	0.25905	0	0	1.6155
Actinobacteria	Actinomycetia	Micrococcales	Promicromonosporaceae	Promicromonospora	0	0.564231	1.05101	0	0	0	0	0	0	0	0	0	0	0	0	0	1.61524
Proteobacteria	Gammaproteobacteria	Cellvibrionales	Cellvibrionaceae	Saccharophagus	0.153552	0.329389	0.15339	0.50079	0	0	0	0	0	0	0	0.154536	0	0.288456	0	0	1.58011
Actinobacteria	Actinomycetia	Propionibacteriales	Actinopolymorphaceae	Actinopolymorpha	0	0	0.769023	0.26854	0	0	0	0	0	0	0	0	0	0.5181	0	0	1.55566
Actinobacteria	Actinomycetia	Propionibacteriales	Kribbellaceae	Kribbella	0	0	0	0	0	0.287236	0	0	0	0.268239	0.25996	0	0	0.734371	0	0	1.54981
Proteobacteria	Alphaproteobacteria	Caulobacterales	Caulobacteraceae	Caulobacter	0.940631	0.605334	0	0	0	0	0	0	0	0	0	0	0	0	0	0	1.54597
Cyanobacteria	unclassified_p__Cyanobacteria	Oscillatoriales	Coleofasciculaceae	Geitlerinema	0	0	0	0	0	0	0	0	1.19901	0	0.31484	0	0	0	0	0	1.51385
Bacteroidota	Cytophagia	Cytophagales	Fulvivirgaceae	Ohtaekwangia	0	0	0	0	0.240384	0	0	0.742209	0	0	0	0.28306	0	0	0	0.235192	1.50085
Proteobacteria	Betaproteobacteria	Burkholderiales	Comamonadaceae	Ramlibacter	0	0	0	0	0	0	0	0	0	0	0	0	0	0.988227	0.484652	0	1.47288
Actinobacteria	Actinomycetia	Micromonosporales	Micromonosporaceae	Wangella	0	0	0	0	0	0	0	0	0	0	0	0	0	0	0.259121	1.17596	1.43508
Chloroflexi	Chloroflexia	Herpetosiphonales	Herpetosiphonaceae	Herpetosiphon	0	0	0	0	0	0	0	1.33679	0	0	0	0	0.0792733	0	0	0	1.41606
Bacteroidota	Cytophagia	Cytophagales	Cytophagaceae	Chryseosolibacter	0	0	0	0	0	0	0	0	0	0	0.280551	1.13224	0	0	0	0	1.41279
Verrucomicrobia	Opitutae	Opitutales	Opitutaceae	Opitutus	1.40862	0	0	0	0	0	0	0	0	0	0	0	0	0	0	0	1.40862
Verrucomicrobia	Verrucomicrobiae	Verrucomicrobiales	Verrucomicrobiaceae	Phragmitibacter	0	0	0	0	0.859426	0	0	0	0.47748	0	0	0	0	0	0	0	1.33691
Actinobacteria	Actinomycetia	Micromonosporales	Micromonosporaceae	Longispora	0	0	0	0	0	0	0	0	0	0	0	0	0.142692	0.197645	0.969304	0	1.30964
Bacteroidota	Flavobacteriia	Flavobacteriales	Weeksellaceae	Moheibacter	0	0	0.322468	0.350933	0	0	0	0.283951	0	0	0.321996	0	0	0	0	0	1.27935
Proteobacteria	Betaproteobacteria	Burkholderiales	Sphaerotilaceae	Azohydromonas	0	0	0	0	0	0	0	0	0	0	0	0	0	0	1.24625	0	1.24625
Proteobacteria	Alphaproteobacteria	Hyphomicrobiales	Stappiaceae	Stappia	0.414702	0	0.207133	0	0	0	0	0	0	0	0.20683	0.417359	0	0	0	0	1.24602
Deinococcus-Thermus	Deinococci	Deinococcales	Deinococcaceae	Deinococcus	0	0.974992	0	0	0	0	0	0	0.215821	0	0	0	0	0	0	0	1.19081
Proteobacteria	Oligoflexia	Bdellovibrionales	Bdellovibrionaceae	Bdellovibrio	0	0	0	0	0	0	0.581993	0	0	0	0	0	0	0	0	0.598851	1.18084
Chlamydiae	Chlamydiia	Parachlamydiales	Parachlamydiaceae	Neochlamydia	0	0	0	0	0	0	0	0	0	0	0	0	0.137596	0	0	1.01805	1.15564
Bacteroidota	Cytophagia	Cytophagales	Cytophagaceae	Dawidia	0	0	0	0	0	0	0	0	0.272501	0	0.572437	0	0	0	0.264356	0	1.10929
Actinobacteria	Actinomycetia	Micromonosporales	Micromonosporaceae	Verrucosispora	0	1.10795	0	0	0	0	0	0	0	0	0	0	0	0	0	0	1.10795
Actinobacteria	Actinomycetia	Micrococcales	Microbacteriaceae	Rathayibacter	0	0	0	0	0	0	0	0	0	0.224908	0.871866	0	0	0	0	0	1.09677
Proteobacteria	Alphaproteobacteria	Hyphomicrobiales	Rhizobiaceae	Peteryoungia	0	0.580352	0	0	0	0	0	0	0	0	0	0	0	0	0.498499	0	1.07885
Bacteroidota	Flavobacteriia	Flavobacteriales	Weeksellaceae	Chryseobacterium	0	0	0	0	0	0	0	0.195216	0	0	0	0	0.451486	0	0.408925	0	1.05563
Proteobacteria	Alphaproteobacteria	Rhodospirillales	Rhodospirillaceae	Rhodospirillum	0	0	0	0	0	0	1.03369	0	0	0	0	0	0	0	0	0	1.03369
Mucoromycota	Mucoromycetes	Mucorales	Rhizopodaceae	Rhizopus	0	0	0	0	0	0	0	0.471466	0	0	0	0	0	0	0	0.439897	0.911363
Proteobacteria	Betaproteobacteria	Burkholderiales	Comamonadaceae	Albitalea	0	0	0	0	0	0	0.87299	0	0	0	0	0	0	0	0	0	0.87299
Proteobacteria	Gammaproteobacteria	Aeromonadales	Aeromonadaceae	Oceanisphaera	0	0	0.866479	0	0	0	0	0	0	0	0	0	0	0	0	0	0.866479
Proteobacteria	Betaproteobacteria	Burkholderiales	Comamonadaceae	Comamonas	0	0	0	0	0	0	0	0	0.79346	0	0	0	0	0	0	0	0.79346
Proteobacteria	Gammaproteobacteria	Chromatiales	Ectothiorhodospiraceae	Alkalilimnicola	0	0	0.777458	0	0	0	0	0	0	0	0	0	0	0	0	0	0.777458
Proteobacteria	Betaproteobacteria	Burkholderiales	Comamonadaceae	Variovorax	0	0	0.756725	0	0	0	0	0	0	0	0	0	0	0	0	0	0.756725
Proteobacteria	Betaproteobacteria	Burkholderiales	Sphaerotilaceae	Rubrivivax	0	0	0	0	0	0	0	0	0	0	0	0.381188	0	0	0	0.316726	0.697914
Actinobacteria	Actinomycetia	Micrococcales	Microbacteriaceae	Mycetocola	0	0	0	0	0	0	0	0	0.333057	0	0.349823	0	0	0	0	0	0.68288
Firmicutes	Bacilli	Bacillales	Thermoactinomycetaceae	Thermoactinomyces	0	0.239909	0	0	0	0	0	0	0	0	0	0.225111	0	0	0.206073	0	0.671093
Proteobacteria	Alphaproteobacteria	Rhodospirillales	Rhodospirillaceae	Haematospirillum	0	0	0	0	0	0	0	0	0	0	0	0	0.271316	0	0.368609	0	0.639924
Proteobacteria	Alphaproteobacteria	Rhodospirillales	Rhodospirillaceae	Caenispirillum	0	0	0	0	0	0.554136	0	0	0	0	0	0	0	0	0	0	0.554136
Proteobacteria	Betaproteobacteria	Burkholderiales	Alcaligenaceae	Achromobacter	0	0	0.228848	0	0	0	0.279263	0	0	0	0	0	0	0	0	0	0.508111
Proteobacteria	Betaproteobacteria	Burkholderiales	unclassified_o__Burkholderiales	Rhizobacter	0	0.507808	0	0	0	0	0	0	0	0	0	0	0	0	0	0	0.507808
Firmicutes	Bacilli	Bacillales	Paenibacillaceae	Paenibacillus	0	0	0	0	0	0	0	0	0	0	0	0	0.226628	0	0	0.279464	0.506092
Proteobacteria	Alphaproteobacteria	Sphingomonadales	Sphingosinicellaceae	Pedomonas	0	0	0	0	0	0	0	0	0	0	0	0	0	0.494114	0	0	0.494114
Proteobacteria	Alphaproteobacteria	Rhodobacterales	Rhodobacteraceae	Rhodobacter	0	0	0	0	0	0	0	0	0	0	0	0	0	0	0.402634	0	0.402634
Proteobacteria	Gammaproteobacteria	Enterobacterales	Enterobacteriaceae	Raoultella	0	0	0	0	0	0	0	0	0	0	0	0	0.36346	0	0	0	0.36346
Acidobacteria	Acidobacteriia	Acidobacteriales	Acidobacteriaceae	Silvibacterium	0	0	0	0	0	0	0	0	0	0	0	0	0.360064	0	0	0	0.360064
Proteobacteria	Betaproteobacteria	Burkholderiales	Burkholderiaceae	Ralstonia	0	0	0	0	0	0	0	0	0	0	0	0.288779	0	0	0	0	0.288779
Bacteroidota	Cytophagia	Cytophagales	Cytophagaceae	Sporocytophaga	0	0	0	0	0	0	0	0	0	0	0	0.25526	0	0	0	0	0.25526
Note
In pot Experiment 1, taxonomic labels are assigned to sequences (reads/ORFs) mapped to KEGG pathway ko01053 using matches to the NCBI non-redundant (nr) protein database. Values are per-sample normalized abundances for each taxon. “Total” indicates the sum across all 16 metagenomes (four biological replicates per treatment). Pathway definitions follow KEGG ko01053.

## Sheet: Table 9
Supplementary Table 9. Metadata for 226 soil metagenomes from globally distributed Fusarium-infected and healthy soils used in the GraftM analyses.
SRA run accession	BioProject accession	BioSample accession	Total bases sequenced (bp)	asbE detected (YES/NO)	Reads placed in reference tree	asbE hits per 10⁹ bp	Sample name	Disease status
SRR30971930	PRJNA1172007	SAMN44261975	15477986824	YES	9	0.290735	HF_1	Healthy
SRR30971931	PRJNA1172007	SAMN44261974	14069729416	YES	19	0.675208	HJ_3	Healthy
SRR30971932	PRJNA1172007	SAMN44261973	14321652380	YES	11	0.384034	HJ_2	Healthy
SRR30971933	PRJNA1172007	SAMN44261972	14398370346	YES	13	0.45144	HJ_1	Healthy
SRR30971934	PRJNA1172007	SAMN44261971	18567224854	YES	99	2.66599	TF_3	Diseased
SRR30971935	PRJNA1172007	SAMN44261970	17672133094	YES	76	2.15028	TF_2	Diseased
SRR30971936	PRJNA1172007	SAMN44261969	17955557980	YES	99	2.75681	TF_1	Diseased
SRR30971937	PRJNA1172007	SAMN44261968	19788381484	YES	127	3.20895	TJ_3	Diseased
SRR30971938	PRJNA1172007	SAMN44261977	15964668582	YES	13	0.407149	HF_3	Healthy
SRR30971939	PRJNA1172007	SAMN44261976	14081460606	YES	16	0.568123	HF_2	Healthy
SRR30971940	PRJNA1172007	SAMN44261967	18847982778	YES	90	2.38752	TJ_2	Diseased
SRR30971941	PRJNA1172007	SAMN44261966	17959016484	YES	99	2.75628	TJ_1	Diseased
SRR2507452	PRJNA295001	SAMN04094111	27243298	NO	0	NA	MZD	Unknow
SRR2508354	PRJNA295001	SAMN04094111	51930963	NO	0	NA	MZD	Unknow
SRR2508737	PRJNA295001	SAMN04094111	49333316	NO	0	NA	MZD	Unknow
SRR13708134	PRJNA701786	SAMN17911232	18484563965	YES	10	0.270496	Fusarium pathogenic soil	Diseased
SRR13708135	PRJNA701786	SAMN17911231	16446799575	YES	6	0.182406	Fusarium pathogenic soil	Diseased
SRR13708136	PRJNA701786	SAMN17911230	16452508320	YES	6	0.182343	Fusarium pathogenic soil	Diseased
SRR13708137	PRJNA701786	SAMN17911229	18033990065	YES	1	0.0277254	Fusarium pathogenic soil	Diseased
SRR13708138	PRJNA701786	SAMN17911228	18840402927	YES	7	0.185771	Fusarium pathogenic soil	Diseased
SRR13708142	PRJNA701786	SAMN17911237	17701380151	NO	0	NA	Fusarium pathogenic soil treated with Talaromyces purpurogenus	Healthy
SRR13708143	PRJNA701786	SAMN17911236	17618149409	YES	5	0.141899	Fusarium pathogenic soil treated with Talaromyces purpurogenus	Healthy
SRR13708144	PRJNA701786	SAMN17911235	16926747399	YES	4	0.118156	Fusarium pathogenic soil treated with Talaromyces purpurogenus	Healthy
SRR13708145	PRJNA701786	SAMN17911234	16916305863	YES	9	0.266016	Fusarium pathogenic soil treated with Talaromyces purpurogenus	Healthy
SRR13708146	PRJNA701786	SAMN17911233	16387542573	YES	12	0.366132	Fusarium pathogenic soil treated with Talaromyces purpurogenus	Healthy
SRR6701370	PRJNA432446	SAMN08465398	8108596	NO	0	NA	NB-2_fungi	Unknown
SRR6701371	PRJNA432446	SAMN08465397	7085018	NO	0	NA	NB-1_fungi	Unknown
SRR6701374	PRJNA432446	SAMN08465392	12972202	NO	0	NA	HB-2_bacteria	Unknown
SRR6701375	PRJNA432446	SAMN08465391	16088348	NO	0	NA	HB-1_bacteria	Unknown
SRR6701377	PRJNA432446	SAMN08465393	15561948	NO	0	NA	HB-3_bacteria	Unknown
SRR6701381	PRJNA432446	SAMN08465411	9535519	NO	0	NA	HB-3_fungi	Unknown
SRR6701382	PRJNA432446	SAMN08465410	8448757	NO	0	NA	HB-2_fungi	Unknown
SRR6701383	PRJNA432446	SAMN08465409	9696459	NO	0	NA	HB-1_fungi	Unknown
SRR6701387	PRJNA432446	SAMN08465387	8972761	NO	0	NA	XB-3_bacteria	Unknown
SRR6701389	PRJNA432446	SAMN08465381	14816500	NO	0	NA	NB-3_bacteria	Unknown
SRR6701390	PRJNA432446	SAMN08465380	15048298	NO	0	NA	NB-2_bacteria	Unknown
SRR6701391	PRJNA432446	SAMN08465379	17090353	NO	0	NA	NB-1_bacteria	Unknown
SRR6701392	PRJNA432446	SAMN08465386	15042010	NO	0	NA	XB-2_bacteria	Unknown
SRR6701393	PRJNA432446	SAMN08465385	13790871	NO	0	NA	XB-1_bacteria	Unknown
SRR6701398	PRJNA432446	SAMN08465403	7025891	NO	0	NA	XB-1_fungi	Unknown
SRR6701399	PRJNA432446	SAMN08465404	5473890	NO	0	NA	XB-2_fungi	Unknown
SRR6701400	PRJNA432446	SAMN08465405	6773645	NO	0	NA	XB-3_fungi	Unknown
SRR6701402	PRJNA432446	SAMN08465399	8235054	NO	0	NA	NB-3_fungi	Unknown
SRR34935514	PRJNA1303966	SAMN50543908	39984001	NO	0	NA	BC6	Unknown
SRR34935515	PRJNA1303966	SAMN50543907	40001715	NO	0	NA	BC5	Unknown
SRR34935517	PRJNA1303966	SAMN50543906	40083628	NO	0	NA	BC4	Unknown
SRR34935518	PRJNA1303966	SAMN50543905	39997692	NO	0	NA	BC3	Unknown
SRR34935519	PRJNA1303966	SAMN50543904	40018130	NO	0	NA	BC2	Unknown
SRR34935520	PRJNA1303966	SAMN50543903	39803369	NO	0	NA	BC1	Unknown
SRR34935521	PRJNA1303966	SAMN50543902	39976222	NO	0	NA	BP1236	Unknown
SRR34935522	PRJNA1303966	SAMN50543901	34964625	NO	0	NA	BP1235	Unknown
SRR34935523	PRJNA1303966	SAMN50543900	39912489	NO	0	NA	BP1234	Unknown
SRR34935524	PRJNA1303966	SAMN50543899	39979854	NO	0	NA	BP1233	Unknown
SRR34935525	PRJNA1303966	SAMN50543898	39981205	NO	0	NA	BP1232	Unknown
SRR34935526	PRJNA1303966	SAMN50543897	40017964	NO	0	NA	BP1231	Unknown
SRR34935528	PRJNA1303966	SAMN50543896	33061550	NO	0	NA	BP236	Unknown
SRR34935529	PRJNA1303966	SAMN50543895	22912699	NO	0	NA	BP235	Unknown
SRR34935530	PRJNA1303966	SAMN50543894	30332938	NO	0	NA	BP234	Unknown
SRR34935531	PRJNA1303966	SAMN50543893	39995601	NO	0	NA	BP233	Unknown
SRR34935532	PRJNA1303966	SAMN50543892	36819448	NO	0	NA	BP232	Unknown
SRR34935533	PRJNA1303966	SAMN50543891	26594209	NO	0	NA	BP231	Unknown
SRR34935534	PRJNA1303966	SAMN50543890	32922782	NO	0	NA	BP136	Unknown
SRR34935535	PRJNA1303966	SAMN50543889	33125964	NO	0	NA	BP135	Unknown
SRR34935536	PRJNA1303966	SAMN50543888	38697004	NO	0	NA	BP134	Unknown
SRR34935537	PRJNA1303966	SAMN50543887	32883461	NO	0	NA	BP133	Unknown
SRR34935539	PRJNA1303966	SAMN50543886	32956388	NO	0	NA	BP132	Unknown
SRR34935540	PRJNA1303966	SAMN50543885	33424451	NO	0	NA	BP131	Unknown
SRR34935541	PRJNA1303966	SAMN50543884	26407698	NO	0	NA	BP126	Unknown
SRR34935542	PRJNA1303966	SAMN50543883	39918618	NO	0	NA	BP125	Unknown
SRR34935543	PRJNA1303966	SAMN50543882	40047606	NO	0	NA	BP124	Unknown
SRR34935544	PRJNA1303966	SAMN50543881	32131559	NO	0	NA	BP123	Unknown
SRR34935545	PRJNA1303966	SAMN50543880	39880095	NO	0	NA	BP122	Unknown
SRR34935546	PRJNA1303966	SAMN50543879	39873390	NO	0	NA	BP121	Unknown
SRR34935547	PRJNA1303966	SAMN50543878	39993572	NO	0	NA	BP36	Unknown
SRR34935548	PRJNA1303966	SAMN50543877	39946183	NO	0	NA	BP35	Unknown
SRR34935550	PRJNA1303966	SAMN50543876	39997091	NO	0	NA	BP34	Unknown
SRR34935551	PRJNA1303966	SAMN50543875	40001216	NO	0	NA	BP33	Unknown
SRR34935552	PRJNA1303966	SAMN50543874	40016257	NO	0	NA	BP32	Unknown
SRR34935553	PRJNA1303966	SAMN50543873	40007250	NO	0	NA	BP31	Unknown
SRR34935554	PRJNA1303966	SAMN50543872	39998063	NO	0	NA	BP26	Unknown
SRR34935555	PRJNA1303966	SAMN50543871	28925156	NO	0	NA	BP25	Unknown
SRR34935556	PRJNA1303966	SAMN50543870	39868118	NO	0	NA	BP24	Unknown
SRR34935557	PRJNA1303966	SAMN50543869	40014860	NO	0	NA	BP23	Unknown
SRR34935558	PRJNA1303966	SAMN50543868	39857094	NO	0	NA	BP22	Unknown
SRR34935559	PRJNA1303966	SAMN50543867	39017112	NO	0	NA	BP21	Unknown
SRR34935561	PRJNA1303966	SAMN50543866	35893832	NO	0	NA	BP16	Unknown
SRR34935562	PRJNA1303966	SAMN50543865	28989696	NO	0	NA	BP15	Unknown
SRR34935563	PRJNA1303966	SAMN50543864	34580421	NO	0	NA	BP14	Unknown
SRR34935564	PRJNA1303966	SAMN50543863	40102554	NO	0	NA	BP13	Unknown
SRR34935565	PRJNA1303966	SAMN50543862	39986572	NO	0	NA	BP12	Unknown
SRR34935566	PRJNA1303966	SAMN50543861	30971943	NO	0	NA	BP11	Unknown
SRR34935567	PRJNA1303966	SAMN50543860	39867233	NO	0	NA	BDEn6	Unknown
SRR34935568	PRJNA1303966	SAMN50543859	39927617	NO	0	NA	BDEn5	Unknown
SRR34935569	PRJNA1303966	SAMN50543858	39978310	NO	0	NA	BDEn4	Unknown
SRR34935570	PRJNA1303966	SAMN50543857	39967196	NO	0	NA	BDEn3	Unknown
SRR34935572	PRJNA1303966	SAMN50543856	39958376	NO	0	NA	BDEn2	Unknown
SRR34935573	PRJNA1303966	SAMN50543855	39975145	NO	0	NA	BDEn1	Unknown
SRR34935574	PRJNA1303966	SAMN50543854	39728800	NO	0	NA	BDEp6	Unknown
SRR34935575	PRJNA1303966	SAMN50543853	39636142	NO	0	NA	BDEp5	Unknown
SRR34935576	PRJNA1303966	SAMN50543852	39645233	NO	0	NA	BDEp4	Unknown
SRR34935577	PRJNA1303966	SAMN50543851	39596001	NO	0	NA	BDEp3	Unknown
SRR34935578	PRJNA1303966	SAMN50543850	39552579	NO	0	NA	BDEp2	Unknown
SRR34935579	PRJNA1303966	SAMN50543849	39736982	NO	0	NA	BDEp1	Unknown
SRR34935606	PRJNA1303968	SAMN50543982	40027437	NO	0	NA	FC6	Unknown
SRR34935607	PRJNA1303968	SAMN50543981	39934412	NO	0	NA	FC5	Unknown
SRR34935609	PRJNA1303968	SAMN50543980	39892339	NO	0	NA	FC4	Unknown
SRR34935610	PRJNA1303968	SAMN50543979	39976515	NO	0	NA	FC3	Unknown
SRR34935611	PRJNA1303968	SAMN50543978	39973219	NO	0	NA	FC2	Unknown
SRR34935612	PRJNA1303968	SAMN50543977	39968277	NO	0	NA	FC1	Unknown
SRR34935613	PRJNA1303968	SAMN50543976	39925579	NO	0	NA	FP1236	Unknown
SRR34935614	PRJNA1303968	SAMN50543975	39971157	NO	0	NA	FP1235	Unknown
SRR34935615	PRJNA1303968	SAMN50543974	40016503	NO	0	NA	FP1234	Unknown
SRR34935616	PRJNA1303968	SAMN50543973	39899780	NO	0	NA	FP1233	Unknown
SRR34935617	PRJNA1303968	SAMN50543972	40021039	NO	0	NA	FP1232	Unknown
SRR34935618	PRJNA1303968	SAMN50543971	39858566	NO	0	NA	FP1231	Unknown
SRR34935620	PRJNA1303968	SAMN50543970	39884264	NO	0	NA	FP236	Unknown
SRR34935621	PRJNA1303968	SAMN50543969	40099254	NO	0	NA	FP235	Unknown
SRR34935622	PRJNA1303968	SAMN50543968	39891565	NO	0	NA	FP234	Unknown
SRR34935623	PRJNA1303968	SAMN50543967	39926301	NO	0	NA	FP233	Unknown
SRR34935624	PRJNA1303968	SAMN50543966	39932047	NO	0	NA	FP232	Unknown
SRR34935625	PRJNA1303968	SAMN50543965	39984242	NO	0	NA	FP231	Unknown
SRR34935626	PRJNA1303968	SAMN50543964	40012491	NO	0	NA	FP136	Unknown
SRR34935627	PRJNA1303968	SAMN50543963	39999865	NO	0	NA	FP135	Unknown
SRR34935628	PRJNA1303968	SAMN50543962	40022786	NO	0	NA	FP134	Unknown
SRR34935629	PRJNA1303968	SAMN50543961	39908121	NO	0	NA	FP133	Unknown
SRR34935631	PRJNA1303968	SAMN50543960	39970613	NO	0	NA	FP132	Unknown
SRR34935632	PRJNA1303968	SAMN50543959	39934714	NO	0	NA	FP131	Unknown
SRR34935633	PRJNA1303968	SAMN50543958	39989901	NO	0	NA	FP126	Unknown
SRR34935634	PRJNA1303968	SAMN50543957	39965844	NO	0	NA	FP125	Unknown
SRR34935635	PRJNA1303968	SAMN50543956	39917320	NO	0	NA	FP124	Unknown
SRR34935636	PRJNA1303968	SAMN50543955	39997434	NO	0	NA	FP123	Unknown
SRR34935637	PRJNA1303968	SAMN50543954	40029252	NO	0	NA	FP122	Unknown
SRR34935638	PRJNA1303968	SAMN50543953	39933470	NO	0	NA	FP121	Unknown
SRR34935639	PRJNA1303968	SAMN50543952	39932780	NO	0	NA	FP36	Unknown
SRR34935640	PRJNA1303968	SAMN50543951	39924071	NO	0	NA	FP35	Unknown
SRR34935642	PRJNA1303968	SAMN50543950	39853733	NO	0	NA	FP34	Unknown
SRR34935643	PRJNA1303968	SAMN50543949	39855836	NO	0	NA	FP33	Unknown
SRR34935644	PRJNA1303968	SAMN50543948	39922143	NO	0	NA	FP32	Unknown
SRR34935645	PRJNA1303968	SAMN50543947	40048111	NO	0	NA	FP31	Unknown
SRR34935646	PRJNA1303968	SAMN50543946	39947016	NO	0	NA	FP26	Unknown
SRR34935647	PRJNA1303968	SAMN50543945	39980523	NO	0	NA	FP25	Unknown
SRR34935648	PRJNA1303968	SAMN50543944	39925018	NO	0	NA	FP24	Unknown
SRR34935649	PRJNA1303968	SAMN50543943	39730450	NO	0	NA	FP23	Unknown
SRR34935650	PRJNA1303968	SAMN50543942	39942807	NO	0	NA	FP22	Unknown
SRR34935651	PRJNA1303968	SAMN50543941	39939300	NO	0	NA	FP21	Unknown
SRR34935653	PRJNA1303968	SAMN50543940	40161773	NO	0	NA	FP16	Unknown
SRR34935654	PRJNA1303968	SAMN50543939	39876310	NO	0	NA	FP15	Unknown
SRR34935655	PRJNA1303968	SAMN50543938	39942407	NO	0	NA	FP14	Unknown
SRR34935656	PRJNA1303968	SAMN50543937	39806922	NO	0	NA	FP13	Unknown
SRR34935657	PRJNA1303968	SAMN50543936	39918414	NO	0	NA	FP12	Unknown
SRR34935658	PRJNA1303968	SAMN50543935	39909586	NO	0	NA	FP11	Unknown
SRR34935659	PRJNA1303968	SAMN50543934	239297056	NO	0	NA	FDEn6	Unknown
SRR34935660	PRJNA1303968	SAMN50543933	239459544	NO	0	NA	FDEn5	Unknown
SRR34935661	PRJNA1303968	SAMN50543932	239703042	NO	0	NA	FDEn4	Unknown
SRR34935662	PRJNA1303968	SAMN50543931	239234764	NO	0	NA	FDEn3	Unknown
SRR34935664	PRJNA1303968	SAMN50543930	234555813	NO	0	NA	FDEn2	Unknown
SRR34935665	PRJNA1303968	SAMN50543929	240044266	NO	0	NA	FDEn1	Unknown
SRR34935666	PRJNA1303968	SAMN50543928	39373812	NO	0	NA	FDEp6	Unknown
SRR34935667	PRJNA1303968	SAMN50543927	39442544	NO	0	NA	FDEp5	Unknown
SRR34935668	PRJNA1303968	SAMN50543926	39511264	NO	0	NA	FDEp4	Unknown
SRR34935669	PRJNA1303968	SAMN50543925	39576671	NO	0	NA	FDEp3	Unknown
SRR34935670	PRJNA1303968	SAMN50543924	39392470	NO	0	NA	FDEp2	Unknown
SRR34935671	PRJNA1303968	SAMN50543923	39516448	NO	0	NA	FDEp1	Unknown
SRR31732669	PRJNA1197765	SAMN45856421	6546219346	YES	3	0.22914	BT-3	Healthy
SRR31732670	PRJNA1197765	SAMN45856420	6595804424	YES	11	0.833863	BT-2	Healthy
SRR31732671	PRJNA1197765	SAMN45856419	6445653648	YES	13	1.00843	BT-1	Healthy
SRR31732672	PRJNA1197765	SAMN45856418	7052086258	YES	4	0.283604	LT-3	Healthy
SRR31732673	PRJNA1197765	SAMN45856417	6582308648	YES	5	0.379806	LT-2	Healthy
SRR31732674	PRJNA1197765	SAMN45856416	6764516422	YES	3	0.221745	LT-1	Healthy
SRR31732675	PRJNA1197765	SAMN45856415	6673348058	YES	5	0.374625	CK-3	Diseased
SRR31732676	PRJNA1197765	SAMN45856414	7192920636	YES	8	0.556102	CK-2	Diseased
SRR31732677	PRJNA1197765	SAMN45856413	6397902012	YES	5	0.390753	CK-1	Diseased
SRR35232943	PRJNA1311632	SAMN50906581	11745343349	YES	9	0.383131	Sample from rhizosphere soil of wheat with symptoms of Fusairum head blight	Diseased
SRR35232944	PRJNA1311632	SAMN50906580	12907150168	YES	16	0.619811	Sample from rhizosphere soil of wheat with symptoms of Fusairum head blight	Diseased
SRR35232945	PRJNA1311632	SAMN50906579	10414945427	YES	8	0.384063	Sample from rhizosphere soil of wheat with symptoms of Fusairum head blight	Diseased
SRR35232946	PRJNA1311632	SAMN50906578	12858409908	YES	16	0.622161	Sample from rhizosphere soil of wheat with symptoms of Fusairum head blight	Diseased
SRR35232947	PRJNA1311632	SAMN50906625	11540354692	YES	4	0.173305	Sample from rhizosphere soil of wheat without symptoms of Fusairum head blight	Healthy
SRR35232948	PRJNA1311632	SAMN50906624	11728330764	YES	14	0.596845	Sample from rhizosphere soil of wheat without symptoms of Fusairum head blight	Healthy
SRR35232949	PRJNA1311632	SAMN50906623	10848713860	YES	3	0.138265	Sample from rhizosphere soil of wheat without symptoms of Fusairum head blight	Healthy
SRR35232950	PRJNA1311632	SAMN50906622	10540844627	YES	6	0.284607	Sample from rhizosphere soil of wheat without symptoms of Fusairum head blight	Healthy
SRR35232951	PRJNA1311632	SAMN50906577	11810225047	YES	11	0.465698	Sample from rhizosphere soil of wheat with symptoms of Fusairum head blight	Diseased
SRR35232952	PRJNA1311632	SAMN50906621	12138880725	YES	6	0.24714	Sample from rhizosphere soil of wheat without symptoms of Fusairum head blight	Healthy
SRR35232953	PRJNA1311632	SAMN50906620	11661122134	YES	12	0.51453	Sample from rhizosphere soil of wheat without symptoms of Fusairum head blight	Healthy
SRR35232954	PRJNA1311632	SAMN50906619	12067388192	YES	8	0.331472	Sample from rhizosphere soil of wheat without symptoms of Fusairum head blight	Healthy
SRR35232955	PRJNA1311632	SAMN50906618	11232906346	YES	10	0.445121	Sample from rhizosphere soil of wheat without symptoms of Fusairum head blight	Healthy
SRR35232956	PRJNA1311632	SAMN50906617	10510080780	YES	14	0.666027	Sample from rhizosphere soil of wheat without symptoms of Fusairum head blight	Healthy
SRR35232957	PRJNA1311632	SAMN50906616	11669171876	YES	9	0.385631	Sample from rhizosphere soil of wheat without symptoms of Fusairum head blight	Healthy
SRR35232958	PRJNA1311632	SAMN50906615	12717536211	YES	12	0.471789	Sample from rhizosphere soil of wheat without symptoms of Fusairum head blight	Healthy
SRR35232959	PRJNA1311632	SAMN50906614	10885056701	YES	6	0.275607	Sample from rhizosphere soil of wheat without symptoms of Fusairum head blight	Healthy
SRR35232960	PRJNA1311632	SAMN50906613	11900459353	YES	18	0.756273	Sample from rhizosphere soil of wheat without symptoms of Fusairum head blight	Healthy
SRR35232961	PRJNA1311632	SAMN50906612	14689290730	YES	13	0.442499	Sample from rhizosphere soil of wheat without symptoms of Fusairum head blight	Healthy
SRR35232962	PRJNA1311632	SAMN50906576	12210633020	YES	14	0.573271	Sample from rhizosphere soil of wheat with symptoms of Fusairum head blight	Diseased
SRR35232963	PRJNA1311632	SAMN50906611	11412876415	YES	11	0.481912	Sample from rhizosphere soil of wheat without symptoms of Fusairum head blight	Healthy
SRR35232964	PRJNA1311632	SAMN50906610	11976925609	YES	17	0.709698	Sample from rhizosphere soil of wheat without symptoms of Fusairum head blight	Healthy
SRR35232965	PRJNA1311632	SAMN50906609	11903429607	YES	13	0.546061	Sample from rhizosphere soil of wheat without symptoms of Fusairum head blight	Healthy
SRR35232966	PRJNA1311632	SAMN50906608	13660327739	YES	22	0.805252	Sample from rhizosphere soil of wheat without symptoms of Fusairum head blight	Healthy
SRR35232967	PRJNA1311632	SAMN50906607	14183485669	YES	23	0.810802	Sample from rhizosphere soil of wheat without symptoms of Fusairum head blight	Healthy
SRR35232968	PRJNA1311632	SAMN50906606	12909507673	YES	5	0.193656	Sample from rhizosphere soil of wheat without symptoms of Fusairum head blight	Healthy
SRR35232969	PRJNA1311632	SAMN50906605	13650807413	YES	9	0.329651	Sample from rhizosphere soil of wheat without symptoms of Fusairum head blight	Healthy
SRR35232970	PRJNA1311632	SAMN50906604	12193286875	YES	5	0.205031	Sample from rhizosphere soil of wheat without symptoms of Fusairum head blight	Healthy
SRR35232971	PRJNA1311632	SAMN50906603	17578907506	YES	11	0.312875	Sample from rhizosphere soil of wheat without symptoms of Fusairum head blight	Healthy
SRR35232972	PRJNA1311632	SAMN50906602	13089321334	YES	5	0.190995	Sample from rhizosphere soil of wheat without symptoms of Fusairum head blight	Healthy
SRR35232973	PRJNA1311632	SAMN50906575	14101061593	YES	10	0.354583	Sample from rhizosphere soil of wheat with symptoms of Fusairum head blight	Diseased
SRR35232974	PRJNA1311632	SAMN50906601	14292000336	YES	5	0.174923	Sample from rhizosphere soil of wheat without symptoms of Fusairum head blight	Healthy
SRR35232975	PRJNA1311632	SAMN50906600	14686007198	YES	14	0.476644	Sample from rhizosphere soil of wheat without symptoms of Fusairum head blight	Healthy
SRR35232976	PRJNA1311632	SAMN50906599	12582745879	YES	3	0.119211	Sample from rhizosphere soil of wheat without symptoms of Fusairum head blight	Healthy
SRR35232977	PRJNA1311632	SAMN50906598	11492922612	YES	8	0.34804	Sample from rhizosphere soil of wheat with symptoms of Fusairum head blight	Diseased
SRR35232978	PRJNA1311632	SAMN50906597	11145631090	YES	12	0.538328	Sample from rhizosphere soil of wheat with symptoms of Fusairum head blight	Diseased
SRR35232979	PRJNA1311632	SAMN50906596	10670142426	YES	10	0.468597	Sample from rhizosphere soil of wheat with symptoms of Fusairum head blight	Diseased
SRR35232980	PRJNA1311632	SAMN50906595	11086411521	YES	5	0.225501	Sample from rhizosphere soil of wheat with symptoms of Fusairum head blight	Diseased
SRR35232981	PRJNA1311632	SAMN50906594	10449772983	YES	30	1.43544	Sample from rhizosphere soil of wheat with symptoms of Fusairum head blight	Diseased
SRR35232982	PRJNA1311632	SAMN50906593	10108209282	YES	3	0.148394	Sample from rhizosphere soil of wheat with symptoms of Fusairum head blight	Diseased
SRR35232983	PRJNA1311632	SAMN50906592	9831155269	YES	20	1.01717	Sample from rhizosphere soil of wheat with symptoms of Fusairum head blight	Diseased
SRR35232984	PRJNA1311632	SAMN50906574	15639811205	YES	41	1.31076	Sample from rhizosphere soil of wheat with symptoms of Fusairum head blight	Diseased
SRR35232985	PRJNA1311632	SAMN50906591	10623320233	YES	9	0.423596	Sample from rhizosphere soil of wheat with symptoms of Fusairum head blight	Diseased
SRR35232986	PRJNA1311632	SAMN50906590	12306942636	YES	9	0.365647	Sample from rhizosphere soil of wheat with symptoms of Fusairum head blight	Diseased
SRR35232987	PRJNA1311632	SAMN50906589	11248905036	YES	28	1.24457	Sample from rhizosphere soil of wheat with symptoms of Fusairum head blight	Diseased
SRR35232988	PRJNA1311632	SAMN50906588	13066566579	YES	22	0.841843	Sample from rhizosphere soil of wheat with symptoms of Fusairum head blight	Diseased
SRR35232989	PRJNA1311632	SAMN50906587	10473164966	YES	10	0.477411	Sample from rhizosphere soil of wheat with symptoms of Fusairum head blight	Diseased
SRR35232990	PRJNA1311632	SAMN50906586	14494154801	YES	10	0.344967	Sample from rhizosphere soil of wheat with symptoms of Fusairum head blight	Diseased
SRR35232991	PRJNA1311632	SAMN50906585	13099136292	YES	14	0.534386	Sample from rhizosphere soil of wheat with symptoms of Fusairum head blight	Diseased
SRR35232992	PRJNA1311632	SAMN50906584	13158810363	YES	14	0.531963	Sample from rhizosphere soil of wheat with symptoms of Fusairum head blight	Diseased
SRR35232993	PRJNA1311632	SAMN50906583	11666359437	YES	11	0.471441	Sample from rhizosphere soil of wheat with symptoms of Fusairum head blight	Diseased
SRR35232994	PRJNA1311632	SAMN50906582	12182622990	YES	17	0.697715	Sample from rhizosphere soil of wheat with symptoms of Fusairum head blight	Diseased
SRR35232995	PRJNA1311632	SAMN50906573	14210878133	YES	13	0.457396	Sample from rhizosphere soil of wheat with symptoms of Fusairum head blight	Diseased
SRR35232996	PRJNA1311632	SAMN50906572	12102517231	YES	5	0.206569	Sample from rhizosphere soil of wheat with symptoms of Fusairum head blight	Diseased
Note
bp, base pairs. asbE detected indicates whether any reads are detected and placed by the GraftM pipeline. “Reads placed in reference tree (n)” denotes the number of reads phylogenetically placed onto the asbE reference tree. asbE hits per 10⁹ bp was calculated as reads placed normalized by sequencing depth (total bases sequenced). NA, not applicable (no reads placed).

## Sheet: Table 10
Supplementary Table 10. Summary statistics of metagenome-assembled genomes (MAGs) across nitrogen supply form and disease-status.
MAG ID	No. of contigs	Genome size (bp)	Longest contig (bp)	N50 (bp)	N90 (bp)	Mean contig length (bp)	Completeness (%)	Contamination (%)
MAG1	251	2615799	62295	19230	4072	10422	93.69	2.99
MAG2	893	2952648	17402	3612	1879	3306	74.05	3.8
MAG4	1007	2785198	10226	2857	1755	2766	68.88	0.84
MAG5	1244	3385133	13821	2823	1718	2721	75.67	3.45
MAG6	734	2063582	16814	2941	1722	2811	63.87	0.86
MAG7	552	5291128	62942	14117	4561	9585	95.43	3.09
MAG8	898	4434352	32617	6203	2420	4938	86.58	3.69
MAG9	457	4188059	48783	12302	4427	9164	82.76	0
MAG10	16	1080582	164480	118041	31485	67536	65.9	0
MAG11	890	4307691	42174	5995	2338	4840	76.01	9.28
MAG12	1617	4408334	12673	2900	1729	2726	68.37	3.03
MAG13	796	2296912	12407	3127	1757	2886	65.67	2.57
MAG14	1191	3037997	11913	2607	1675	2551	63.72	1.58
MAG15	498	2499199	27290	6634	2414	5018	92.09	4.86
MAG16	565	2082446	24792	4202	2066	3686	74.65	3.24
MAG17	834	4295192	29105	6715	2490	5150	93.69	2.27
MAG18	549	1864452	14080	3810	1976	3396	59.55	2.14
MAG19	534	3339430	38910	8795	2784	6254	92.21	2.27
MAG20	692	1740389	8945	2522	1639	2515	59.9	8.58
MAG21	514	1691615	13478	3538	1878	3291	54.01	0.57
MAG22	488	1719561	15141	3729	2095	3524	66.24	2.02
MAG23	786	2338230	13681	3189	1785	2975	73.42	5.47
MAG24	157	3519042	208203	38318	10838	22414	100	7.08
MAG25	476	2123951	22120	5394	2206	4462	78.3	3.7
MAG26	888	4967594	54318	7464	2680	5594	84.48	3.49
MAG27	1040	2765760	9825	2723	1698	2659	61.53	2.53
MAG28	897	3954027	26459	5356	2208	4408	68.73	1.72
MAG29	525	1733089	11806	3573	1951	3301	59.95	0
MAG3	649	1946969	13958	3187	1832	3000	68.69	1.28
MAG30	574	5556000	54297	15095	4412	9679	95.45	5.77
MAG31	472	1557720	13955	3732	1896	3300	59.88	1.85
MAG32	851	3770328	21905	5362	2398	4430	89.69	0
MAG33	515	1769155	18005	3872	1839	3435	68.47	1.65
MAG34	1216	2690140	7439	2155	1607	2212	51.29	9.19
MAG35	721	1783751	10257	2510	1620	2474	58.89	3.81
MAG36	768	2891268	16489	4397	2058	3765	76.91	3.34
Note
Pot Experiment 1: assembly and quality metrics are reported for metagenome-assembled genomes (MAGs). N50 and N90 are contig lengths such that ≥50% or ≥90% of the assembly is contained in contigs of that length or longer. Completeness and contamination are estimated using lineage-specific single-copy marker genes (e.g., CheckM) and interpreted under MIMAG guidance (high-quality draft MAGs typicall…

[truncated: 3 more sheets: Table 11, Table 12, Table 13]
